# Supplementary material for: Collagen promotes anti-PD-1/PD-L1 resistance in cancer through LAIR1-dependent CD8+ T cell exhaustion
Source: PubMed Central journal article supplement (PMC7481212; doi:10.1038/s41467-020-18298-8), 2020-09-09
Supplement: 41467_2020_18298_MOESM1_ESM.pdf [file 41467_2020_18298_MOESM1_ESM.pdf]

**Collagen promotes anti-PD-1/PD-L1 resistance in cancer through LAIR1-dependent CD8<sup>+</sup> T cell  
exhaustion**

Peng et al.

# Supplementary Figure 1. PD-(L)1 blockade is associated with increased tumor-associated collagen deposition

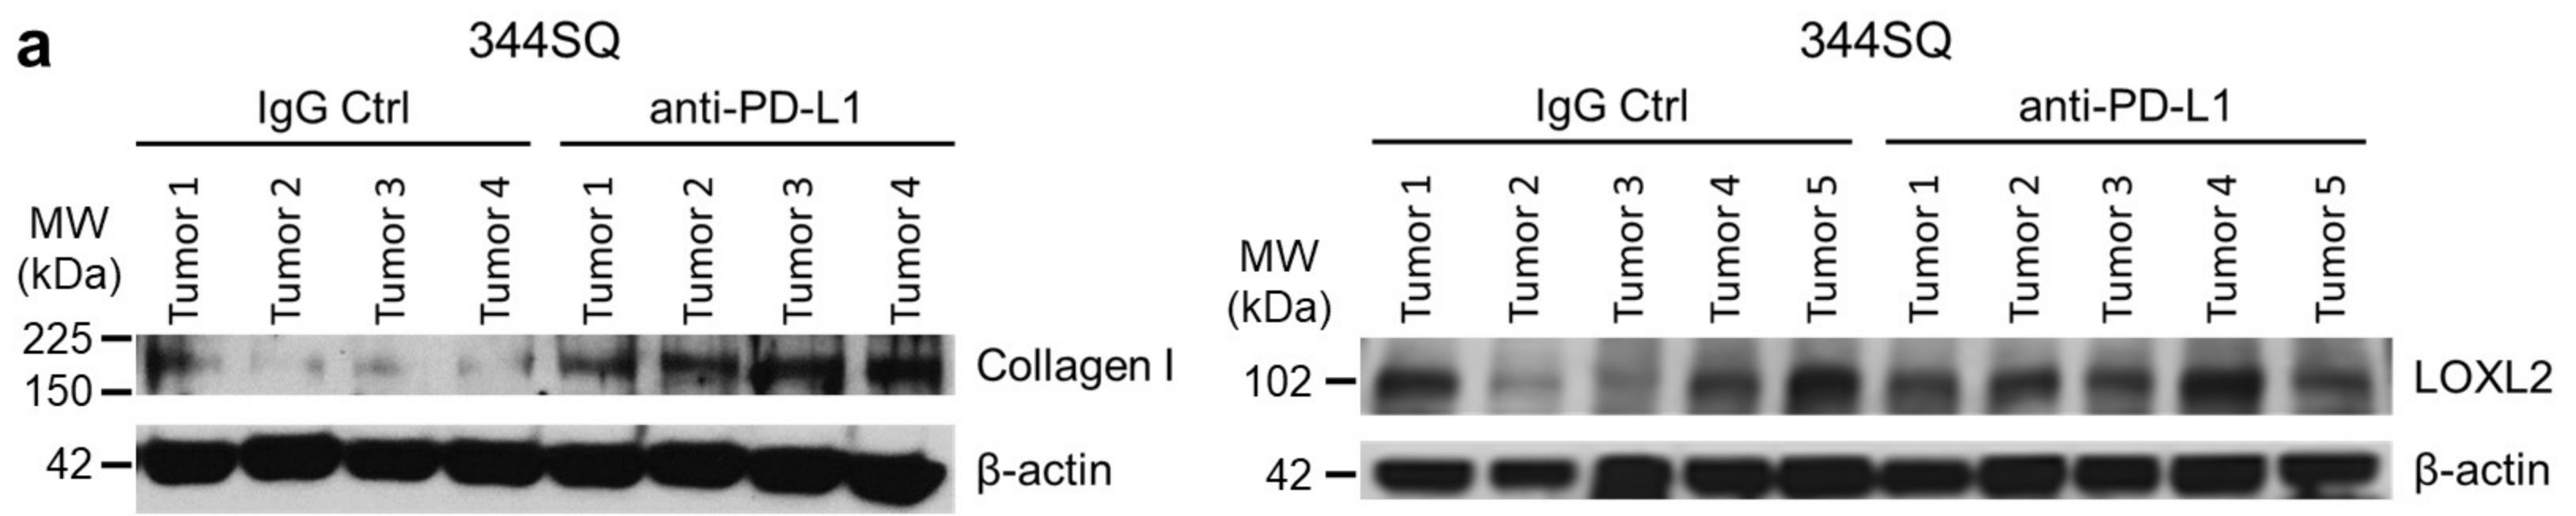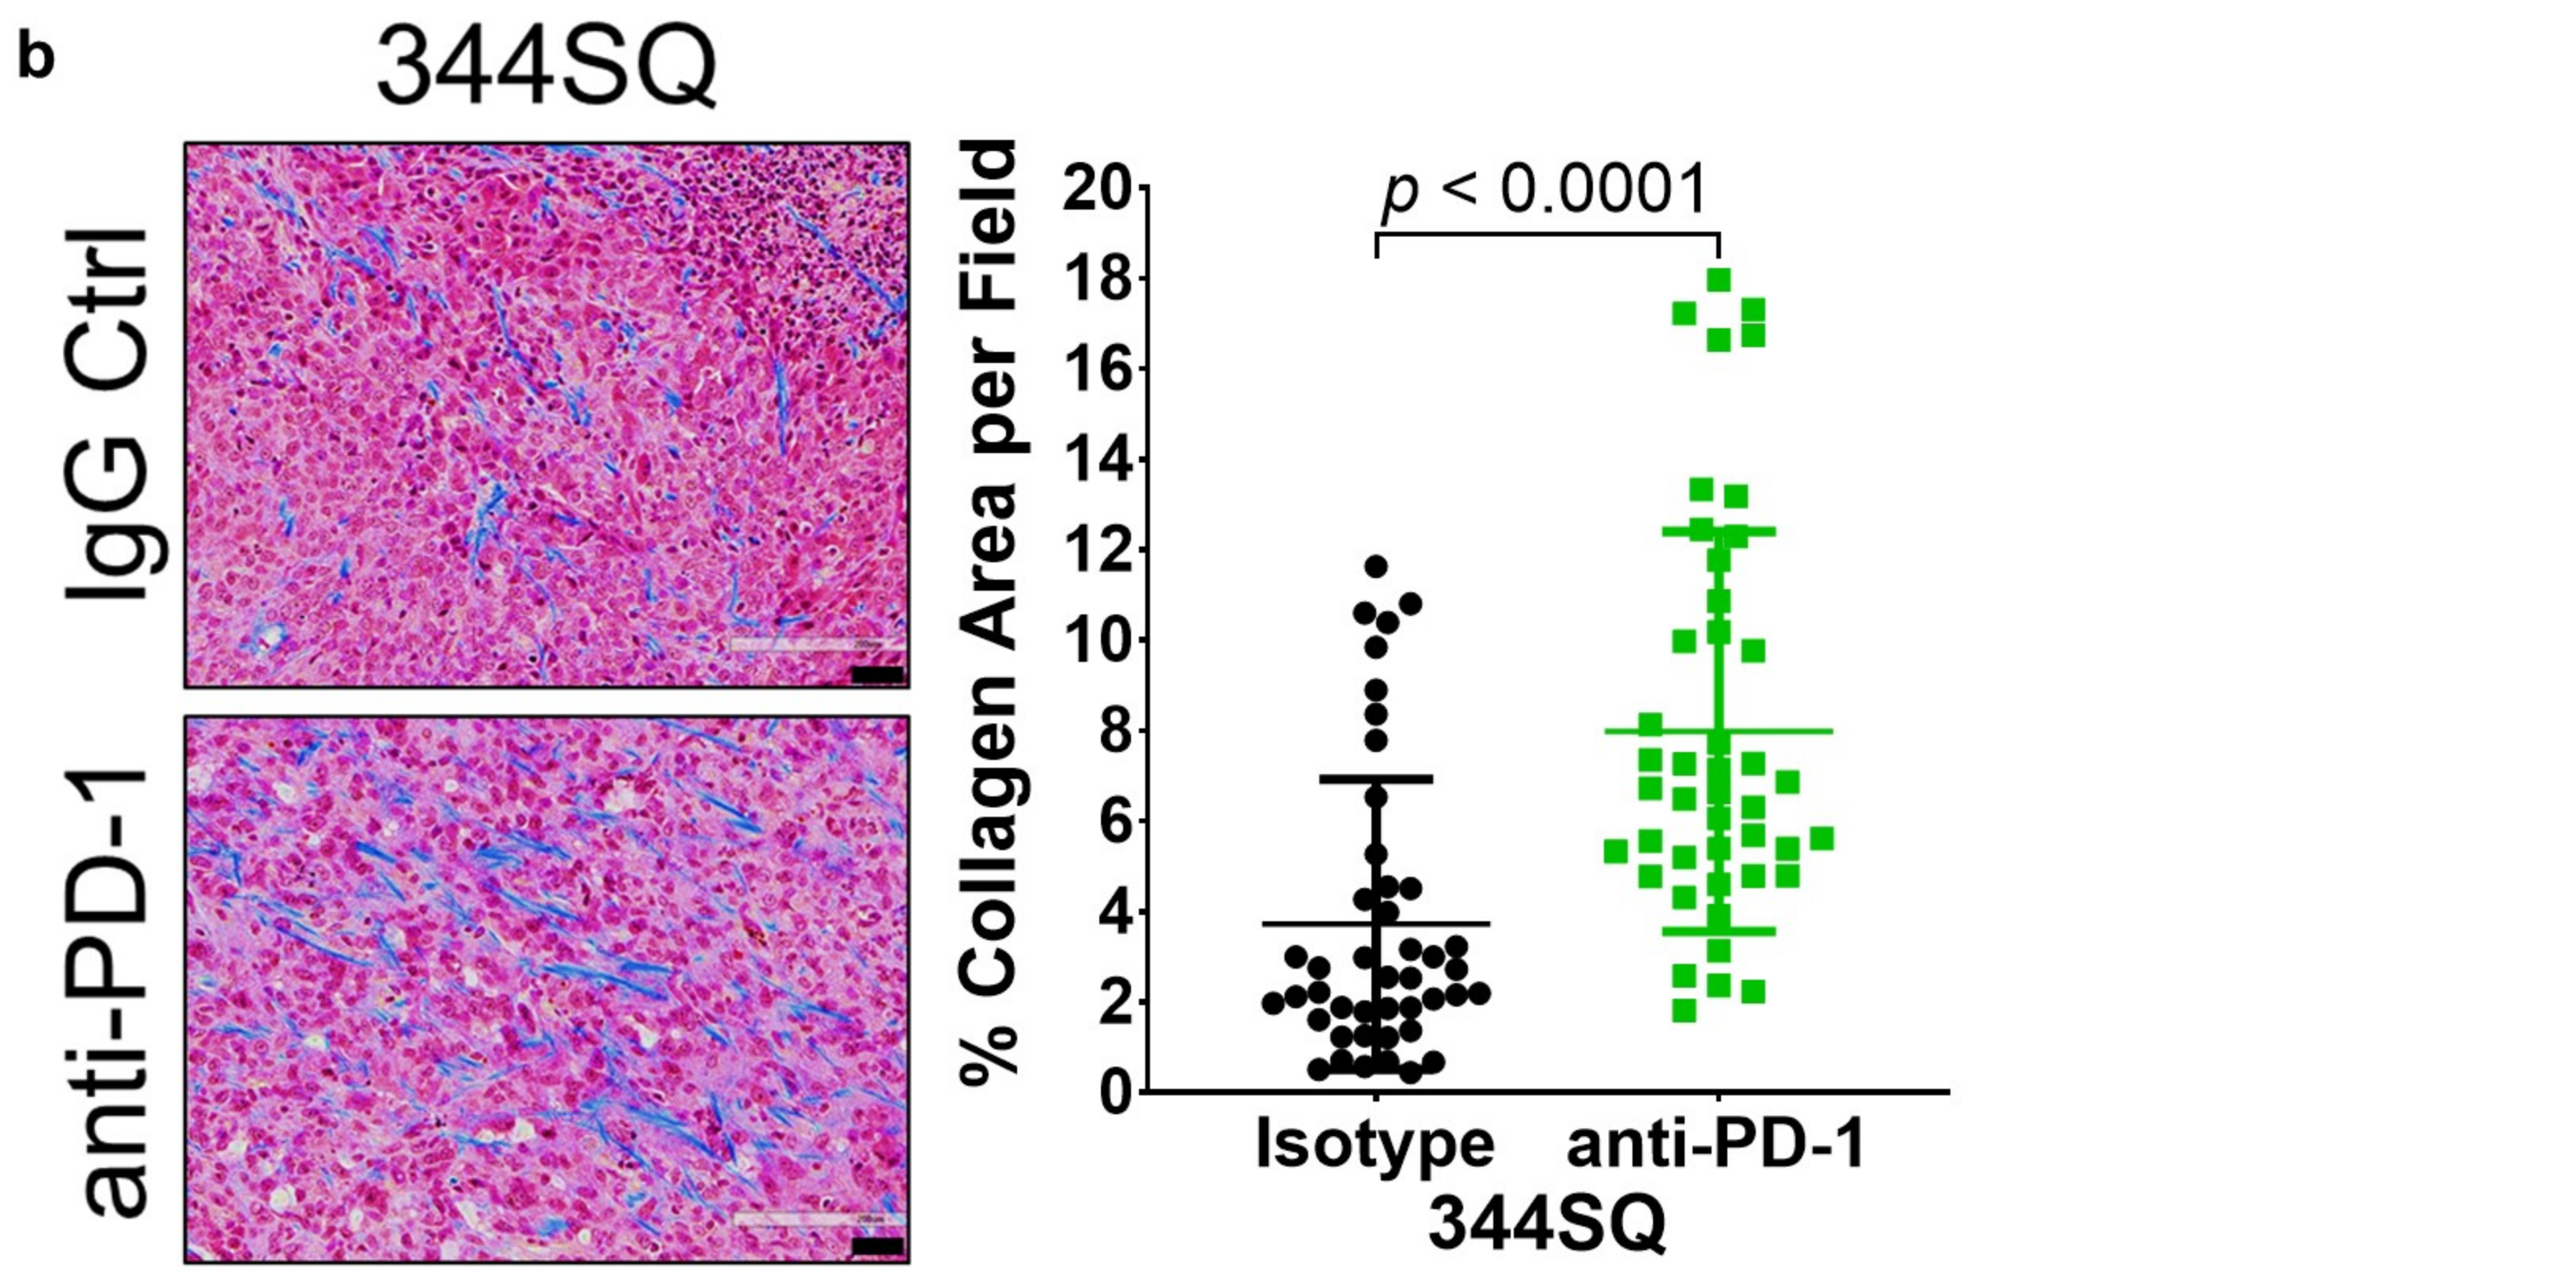

## Supplementary Figure Legends

### **Supplementary Figure 1. PD-(L)1 blockade is associated with increased tumor-associated collagen deposition**

**(a)** Western blots of collagen I, LOXL2, and  $\beta$ -actin loading control from representative 344SQ tumors treated weekly with anti-PD-L1 (200  $\mu$ g/mouse) or IgG isotype control (200  $\mu$ g/mouse). Western blots performed once for each experiment due to limited protein quantities.

**(b)** Representative trichrome stains including quantification of percent collagen area per field of 344SQ tumors treated weekly with IgG isotype control or anti-PD-1 (200  $\mu$ g/mouse) after 1 week of implantation. Tumors were analyzed at endpoint of experiment; n = 5 tumors per treatment group and 44 total microscopy fields across all tumor samples were analyzed. Scale bars, 50  $\mu$ m. Data presented as mean +/- SD. Statistics calculated using two-tailed student's t-test.



Supplementary Figure 2. LOXL2 knockdown or inhibition reduces intratumoral collagen crosslinking and deposition with no effect on tumor size

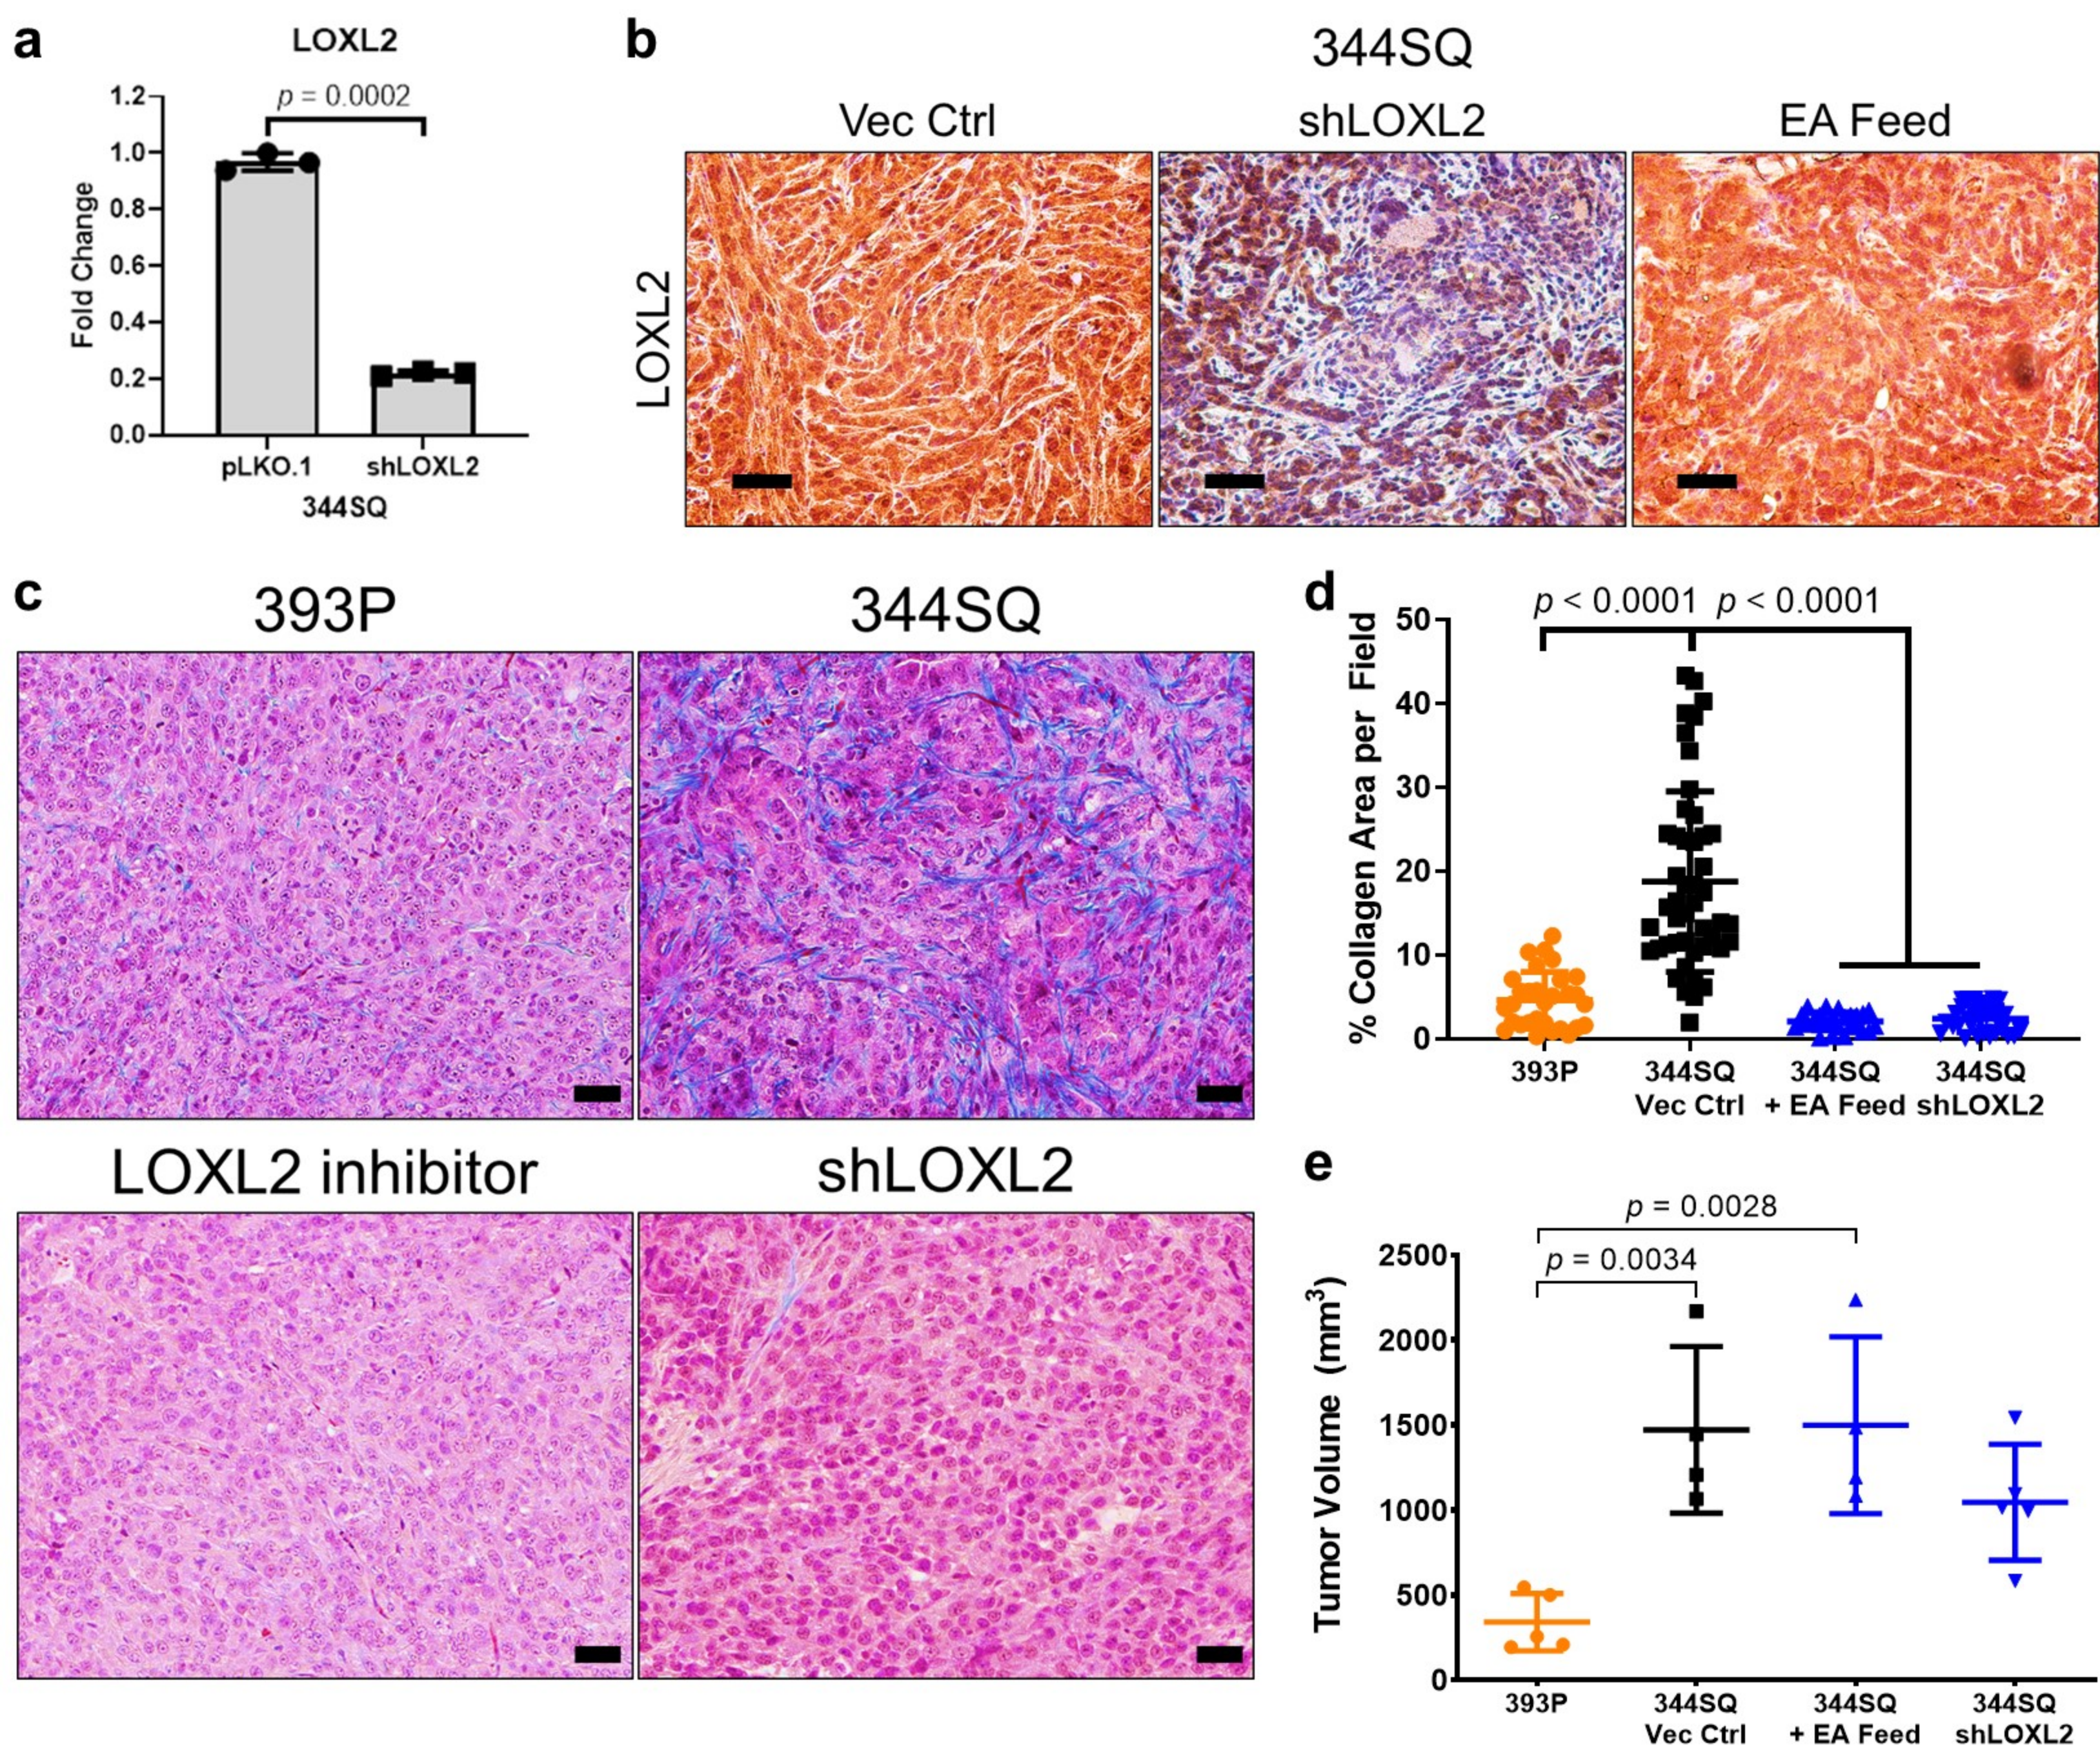



**Supplementary Figure 2. LOXL2 knockdown or inhibition reduces intratumoral collagen crosslinking and deposition with no effect on tumor size**

**(a)** QPCR of LOXL2 mRNA levels in 344SQ cells transduced with stable LOXL2 shRNA or vector control; n = 3 replicates per group. Data presented as mean +/- SD. Statistics calculated using two-tailed student's t-test. Representative qPCR data repeated over three independent runs.

**(b)** Representative LOXL2 IHC images of 344SQ tumors with stable LOXL2 shRNA knockdown or treated with ellagic acid (EA) feed from the experiment in Fig. 2. Scale bar, 50  $\mu$ m.

**(c – d)** Representative trichrome stain images **(c)** and quantification **(d)** of 393P or 344SQ KP tumors with LOXL2 inhibition or knockdown; 393P and 344SQ-shLOXL2 n = 5 tumors with 6 fields quantified per tumor (30 fields total); 344SQ Vec Ctrl n = 4 tumors with 47 total fields quantified; 344SQ EA Feed n = 4 tumors with 26 total fields quantified. Scale bars, 50  $\mu$ m. Data presented as mean +/- SD. Statistics calculated using one-way ANOVA post-hoc Tukey test.

**(e)** Quantification of final primary tumor volumes for indicated tumor groups from the experiment in Fig. 2a; 393P and 344SQ-shLOXL2 n = 5 mice per group; 344SQ Vec Ctrl and EA feed n = 4 mice per group. Data presented as mean +/- SD. Statistics calculated using one-way ANOVA post-hoc Tukey test.



Supplementary Figure 3. Flow cytometry sample gating strategy for live T cell populations in 344SQ tumors

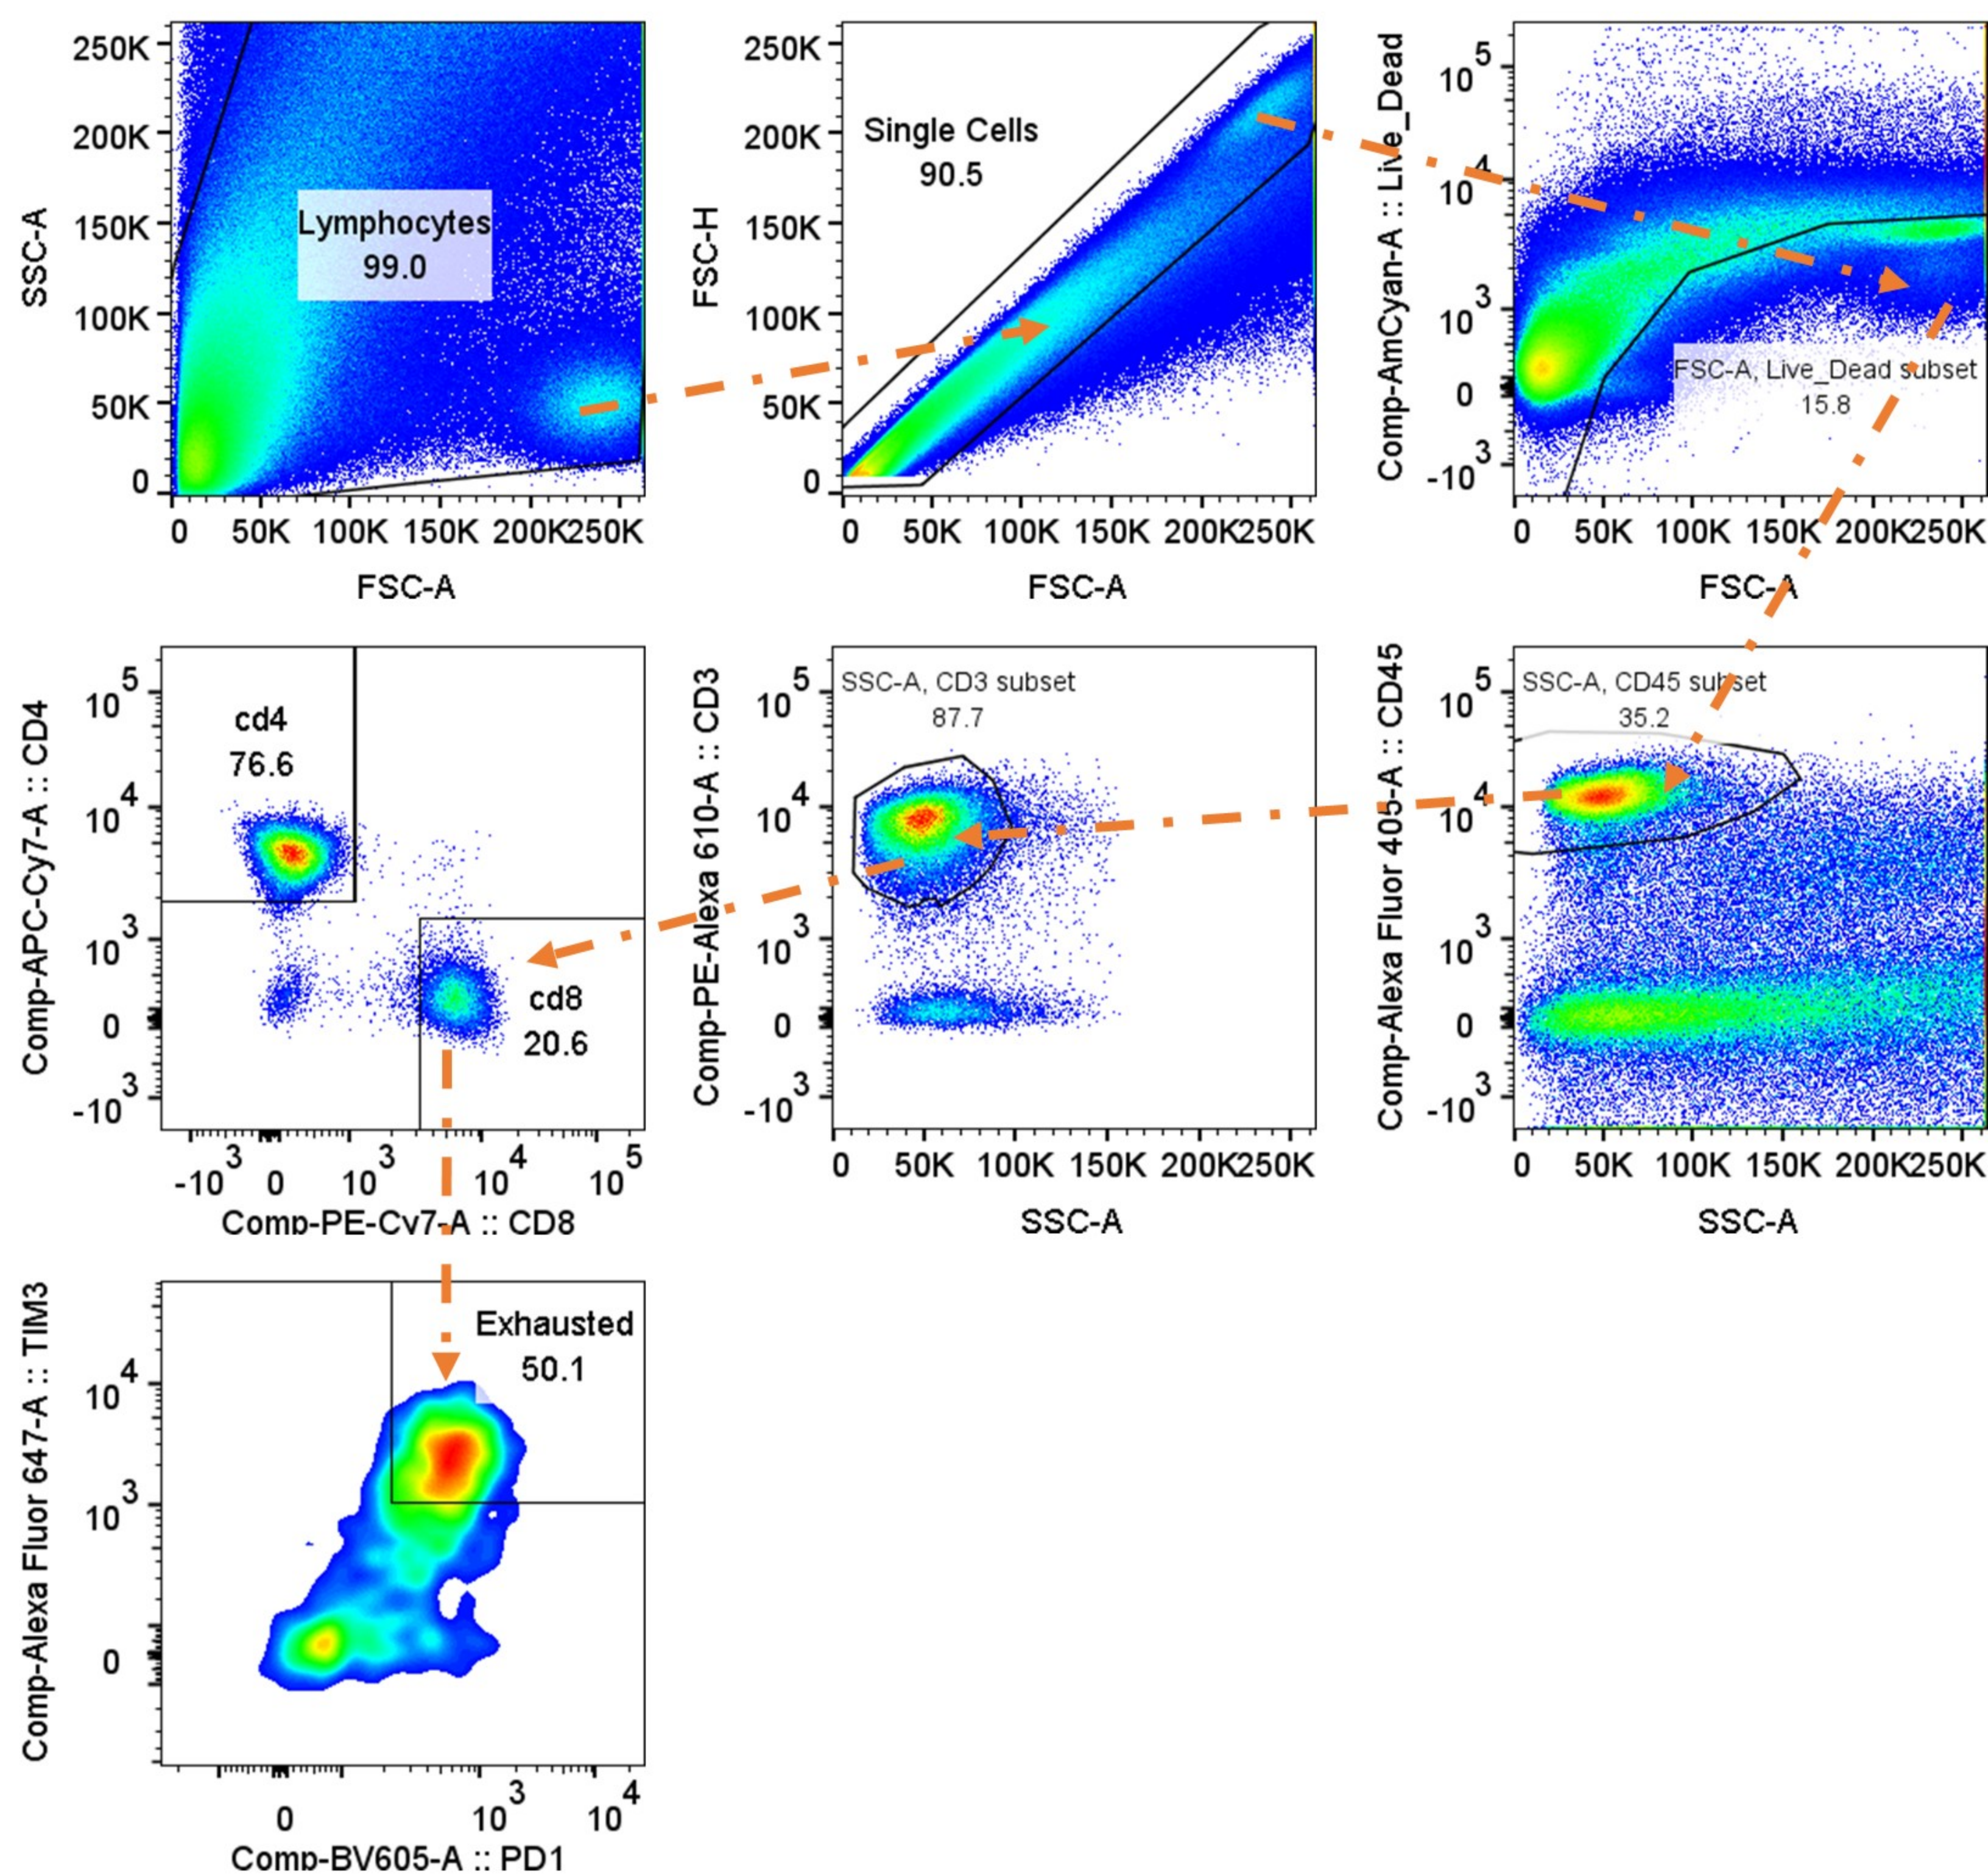



**Supplementary Figure 3. Flow cytometry sample gating strategy for live T cell populations in 344SQ tumors**

Tumor cell suspensions were gated for total cells (FSC-A vs. SSC-A) → cell singlets (FSC-A vs. FSC-H) → Live cells (FSC-A vs. Live/Dead) → CD45<sup>+</sup> cells (SSC-A vs. CD45) → CD3<sup>+</sup> cells (SSC-A vs. CD3) → CD8<sup>+</sup>CD4<sup>-</sup> cells (CD8 vs. CD4) → PD-1<sup>+</sup>TIM-3<sup>+</sup> cells (PD-1 vs. TIM3).

Supplementary Figure 4. Tumors with decreased collagen do not exhibit consistent or significant changes in other immune subpopulations

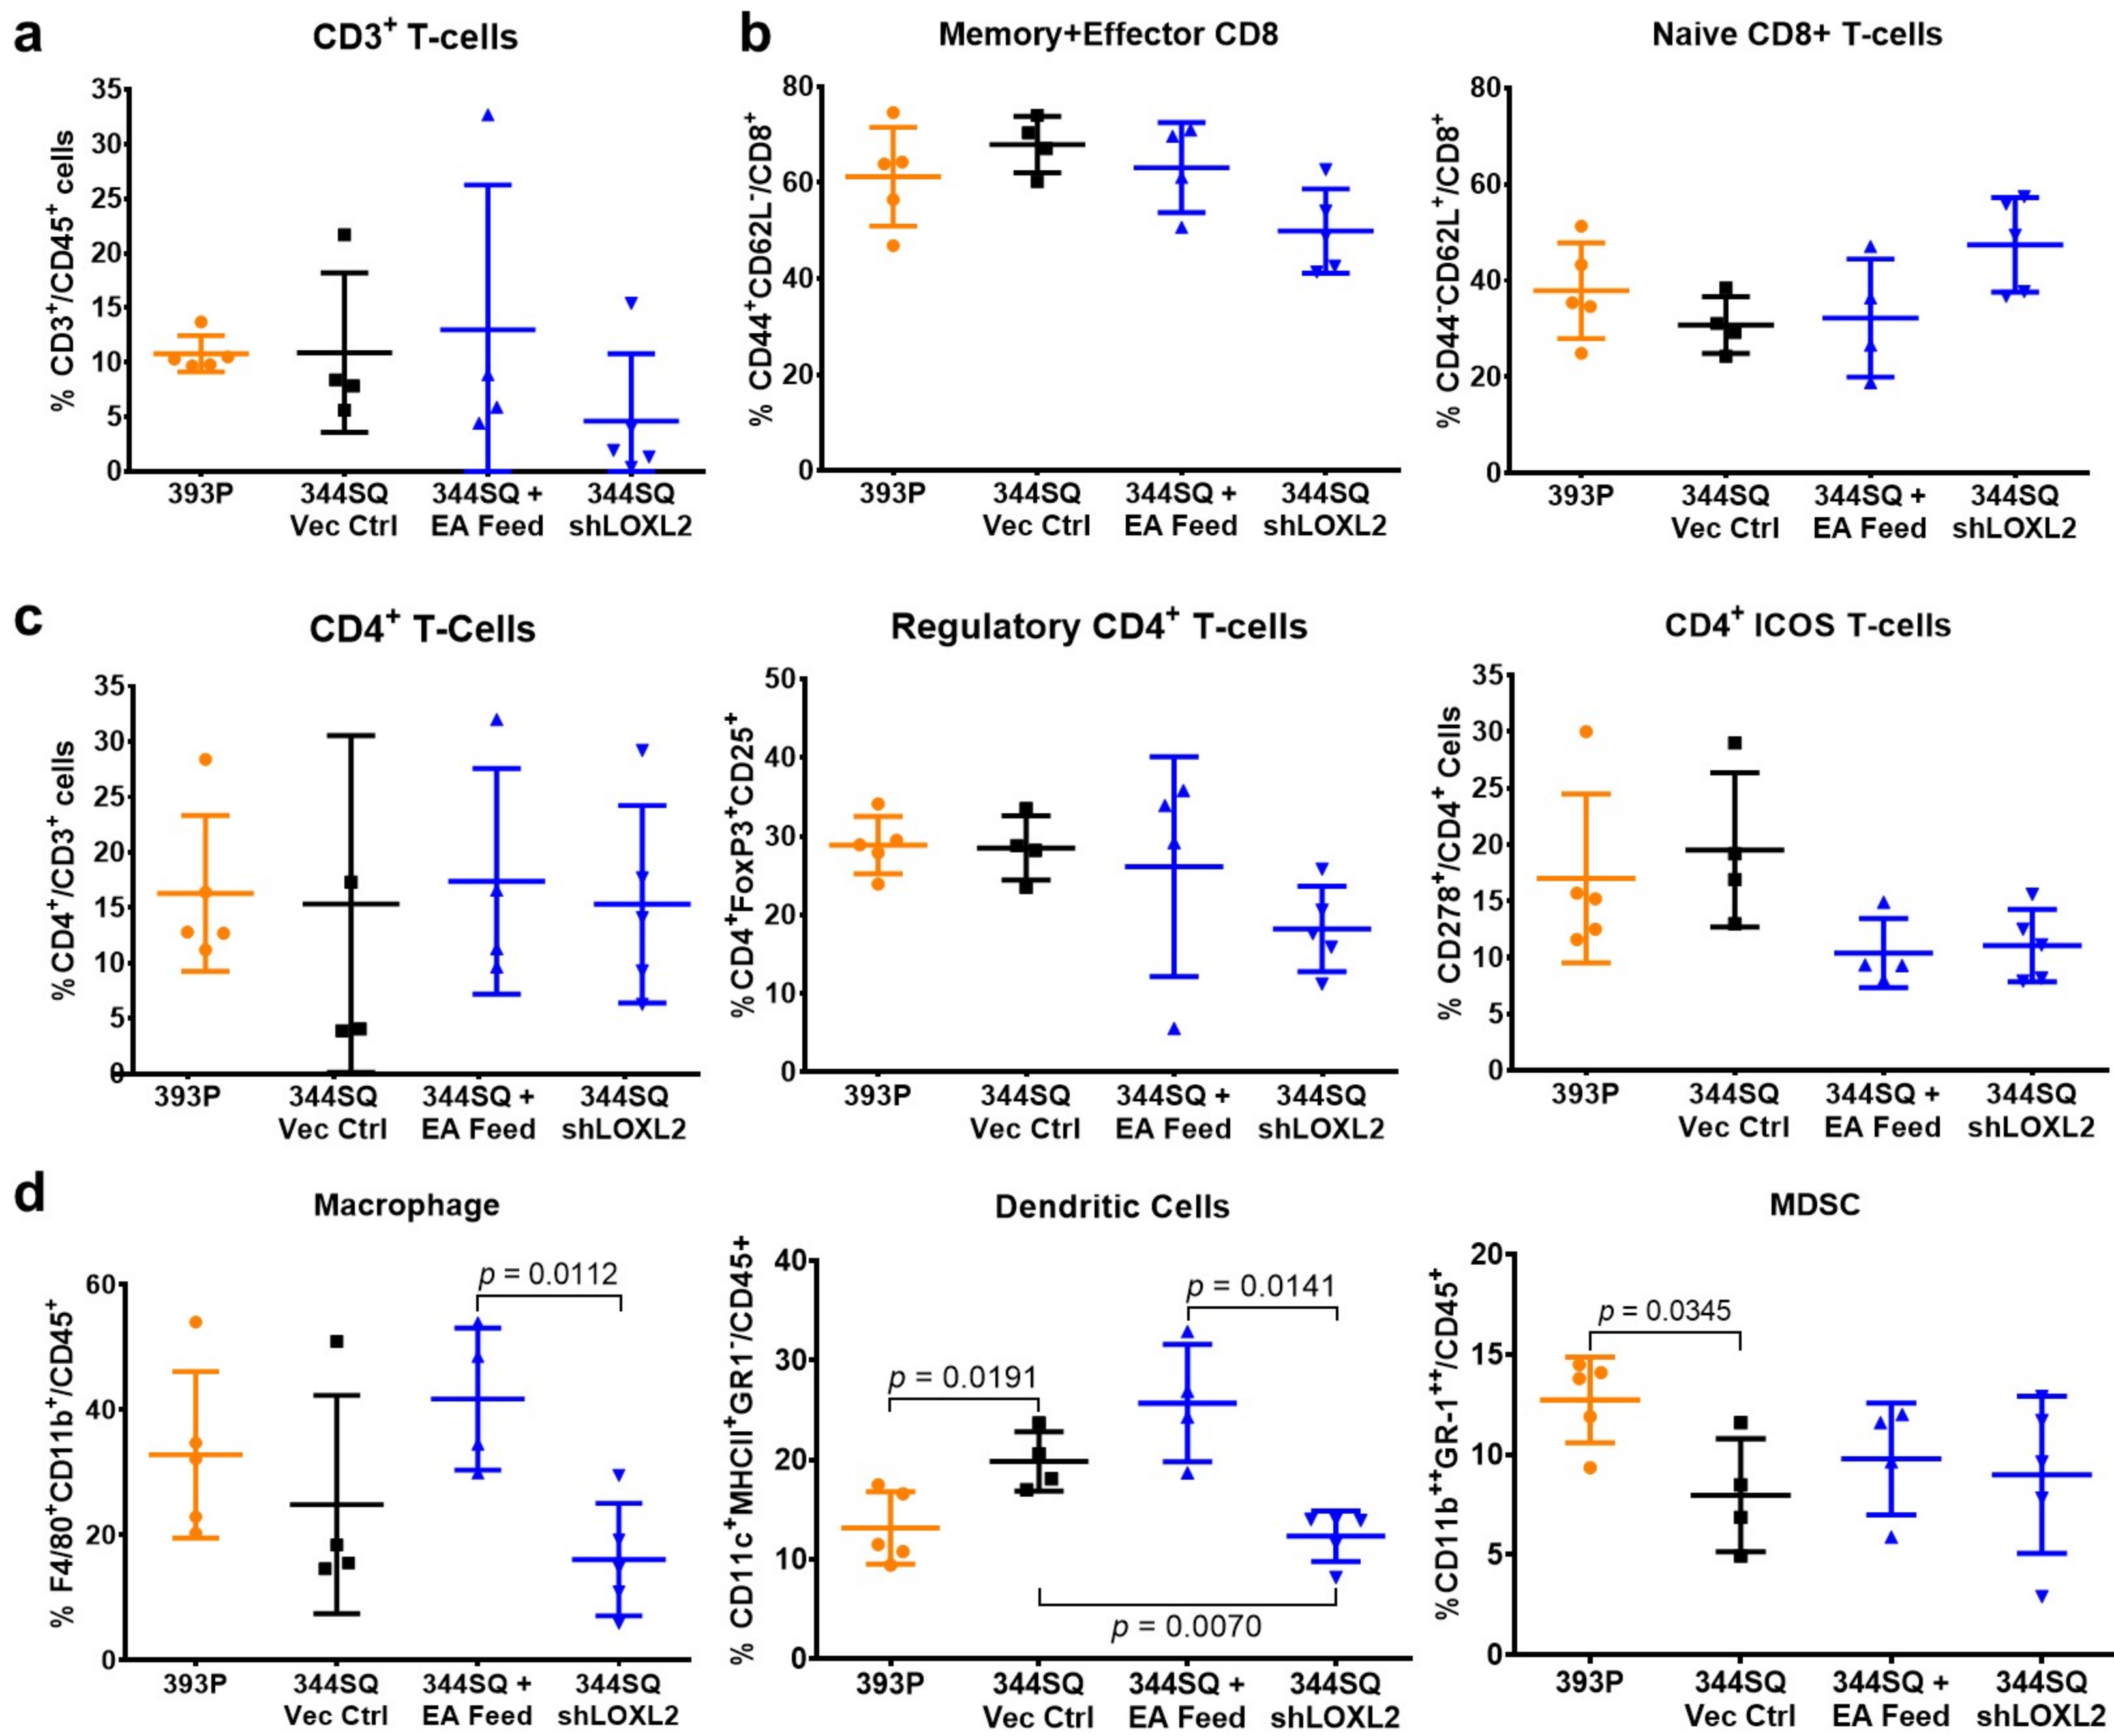



**Supplementary Figure 4. Tumors with decreased collagen do not exhibit consistent or significant changes in other immune subpopulations**

**(a – d)** Quantification of FACS percentages of specified tumor cell suspensions for **(a)** total CD3<sup>+</sup> T cells; **(b)** memory/effector and naïve CD8<sup>+</sup> T cells gated from total CD45<sup>+</sup>CD3<sup>+</sup>CD8<sup>+</sup> populations in Fig. 2c; **(c)** regulatory and ICOS CD4<sup>+</sup> T cells gated from total CD45<sup>+</sup>CD3<sup>+</sup>CD4<sup>+</sup> populations; and **(d)** indicated APC subpopulations; n = 5 biological replicates for 393P tumors and 4 biological replicates for each 344SQ tumor treatment group. All data presented as mean +/- SD. Statistics calculated using one-way ANOVA post-hoc Tukey test.



# Supplementary Figure 5. LOXL2 knockdown reduces collagen deposition and sensitizes tumors to PD-L1 blockade

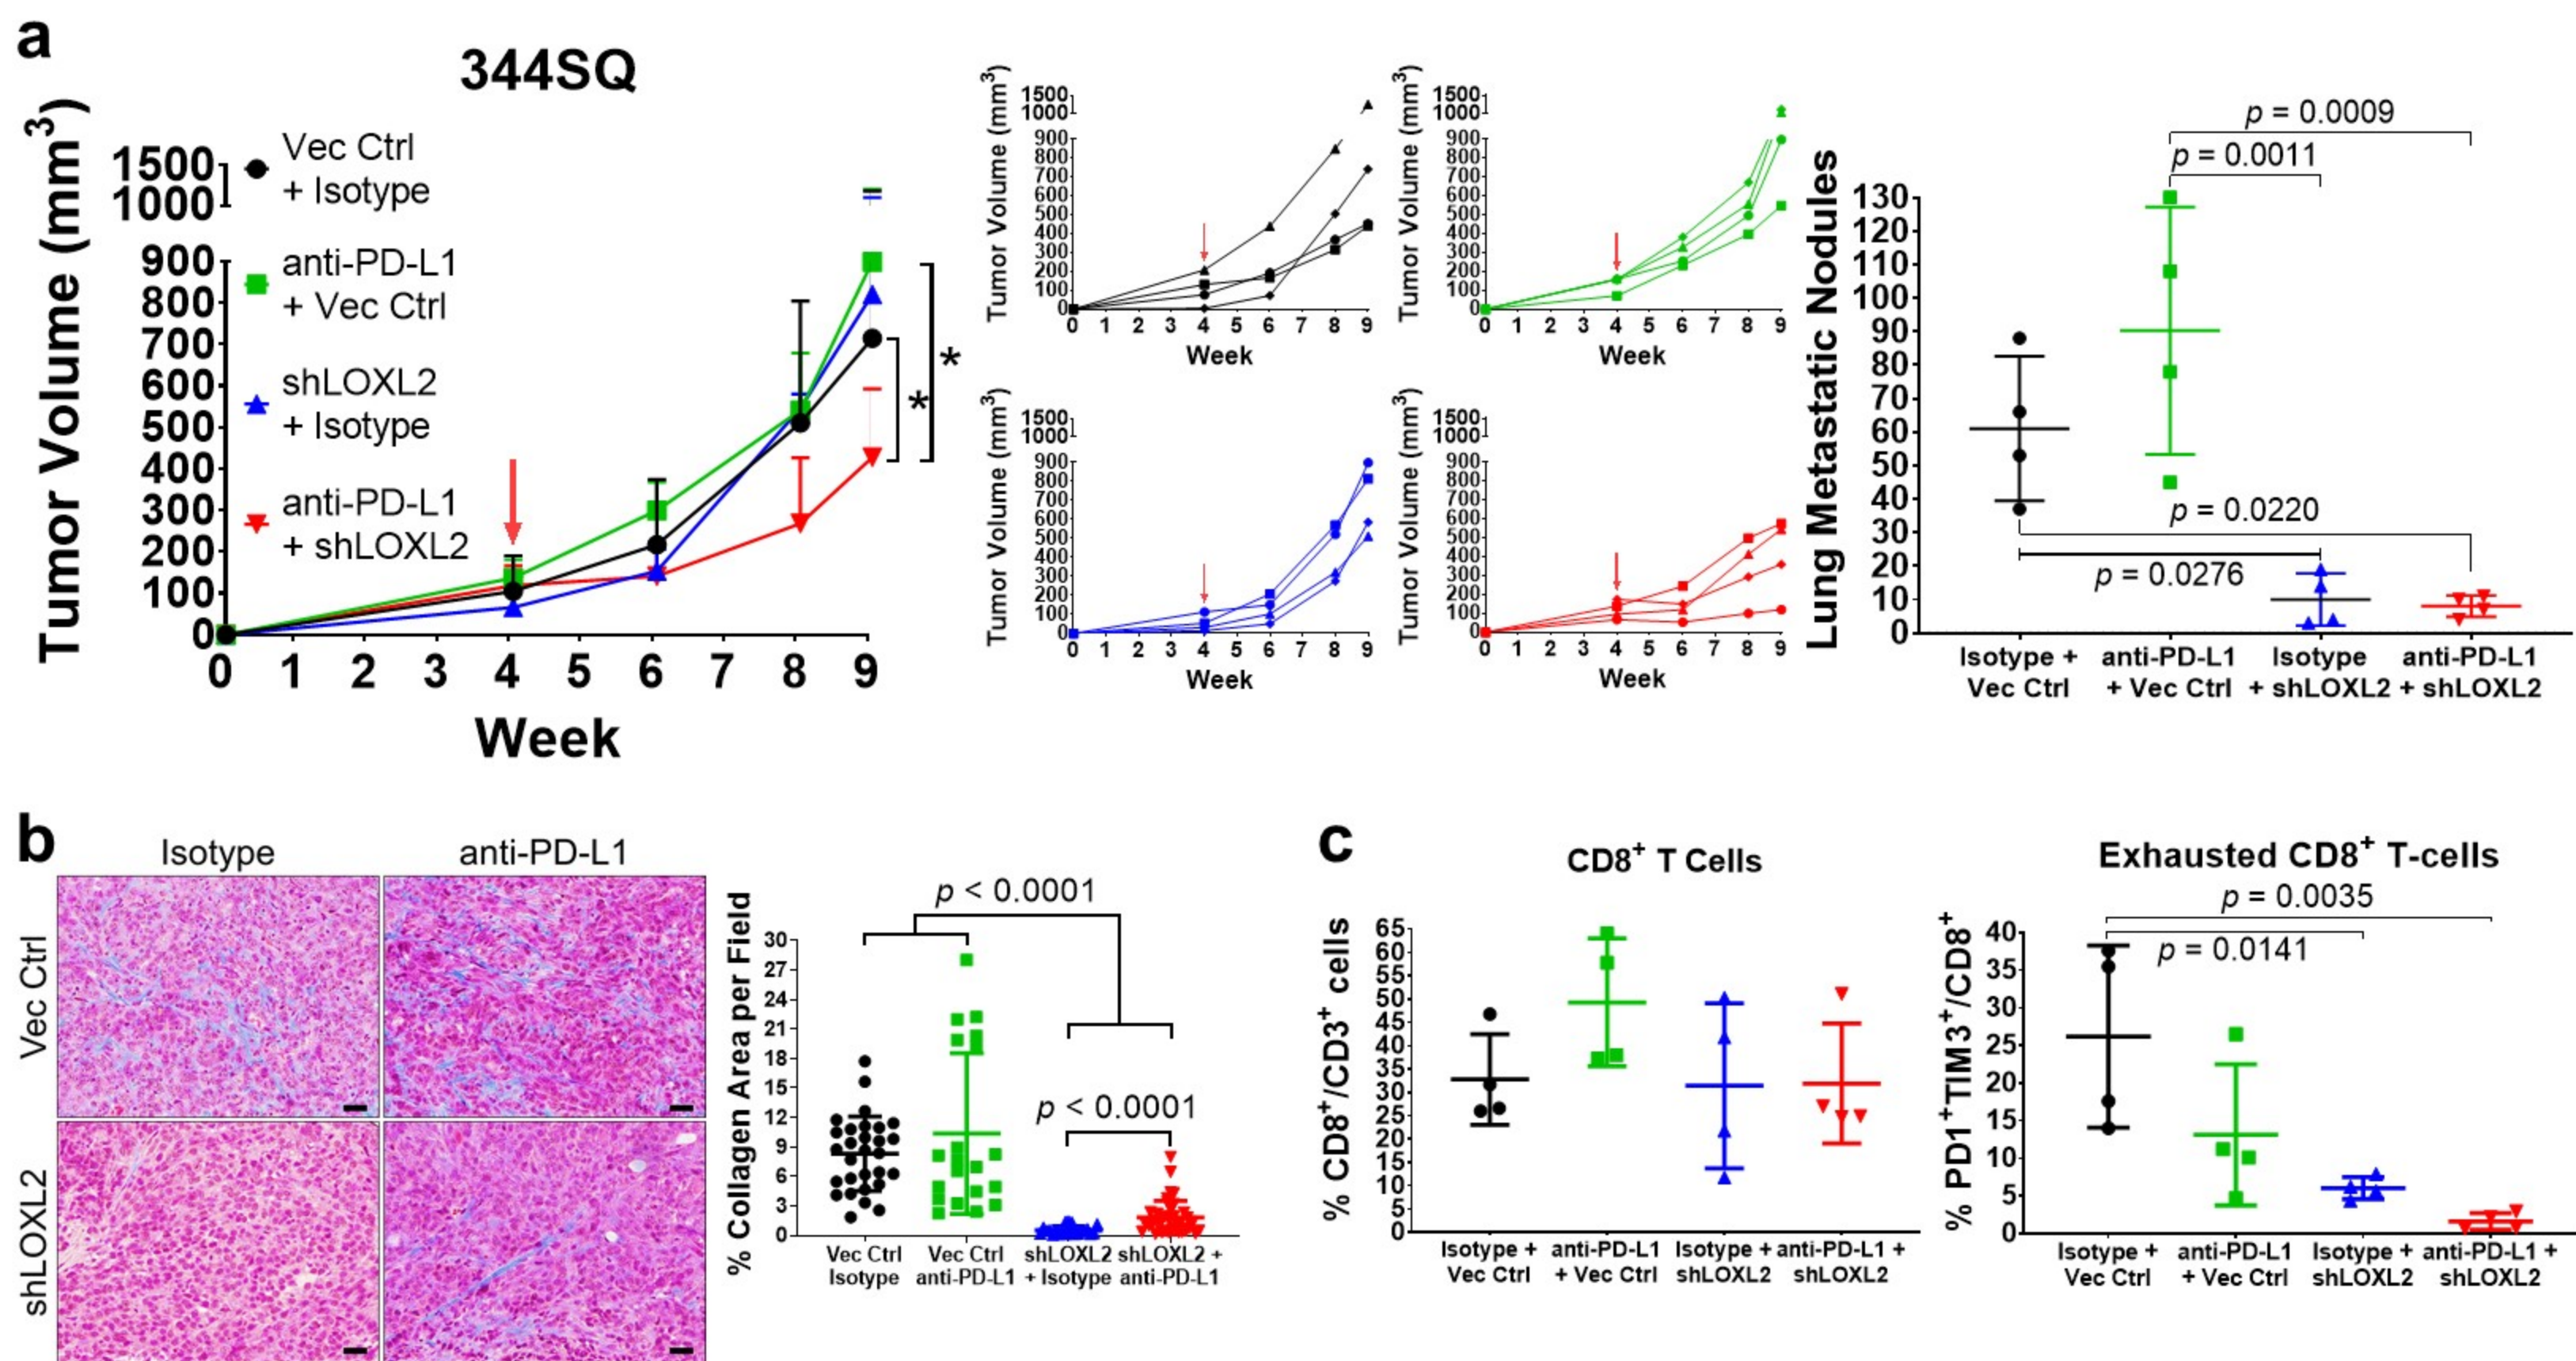



**Supplementary Figure 5. LOXL2 knockdown reduces collagen deposition and sensitizes tumors to PD-L1 blockade.**

**(a)** Left: Tumor volume measurements at indicated time points for 344SQ subcutaneous tumors with LOXL2 knockdown treated weekly with anti-PD-L1 (200 µg/mouse) or isotype control (200 µg/mouse). Starting time of PD-L1 blockade denoted by red arrow. Middle: Tumor volume measurements for individual mice in each treatment group from aforementioned experiment. Right: Quantification of lung metastatic surface nodules in indicated treatment groups at endpoint of experiment; n = 4 mice per treatment group.

**(b)** Representative trichrome stains including quantification of percent collagen area per field of 344SQ tumors in the indicated treatment groups at the endpoint of the experiment from **(a)**; n = 4 tumors per treatment group with 29 (Vec Ctrl + Isotype), 20 (Vec Ctrl + anti-PD-L1), 22 (shLOXL2 + Isotype), and 39 (shLOXL2 + anti-PD-L1) total fields analyzed across all tumors in respective groups. Scale bars, 50 µm.

**(c)** Quantification of FACS percentage of total CD8<sup>+</sup> (left) and PD-1<sup>+</sup>TIM-3<sup>+</sup> exhausted (right) CD8<sup>+</sup> TILs gated from CD3<sup>+</sup> cell suspensions for individual tumor samples from the experiment in **(a)**; n = 4 tumors per group. All data presented as mean +/- SD and statistics calculated using one-way ANOVA post-hoc Tukey test. \**p* < 0.05.



Supplementary Figure 6. LOXL2 knockdown increases CD8 TILs in primary and metastatic lung tumors

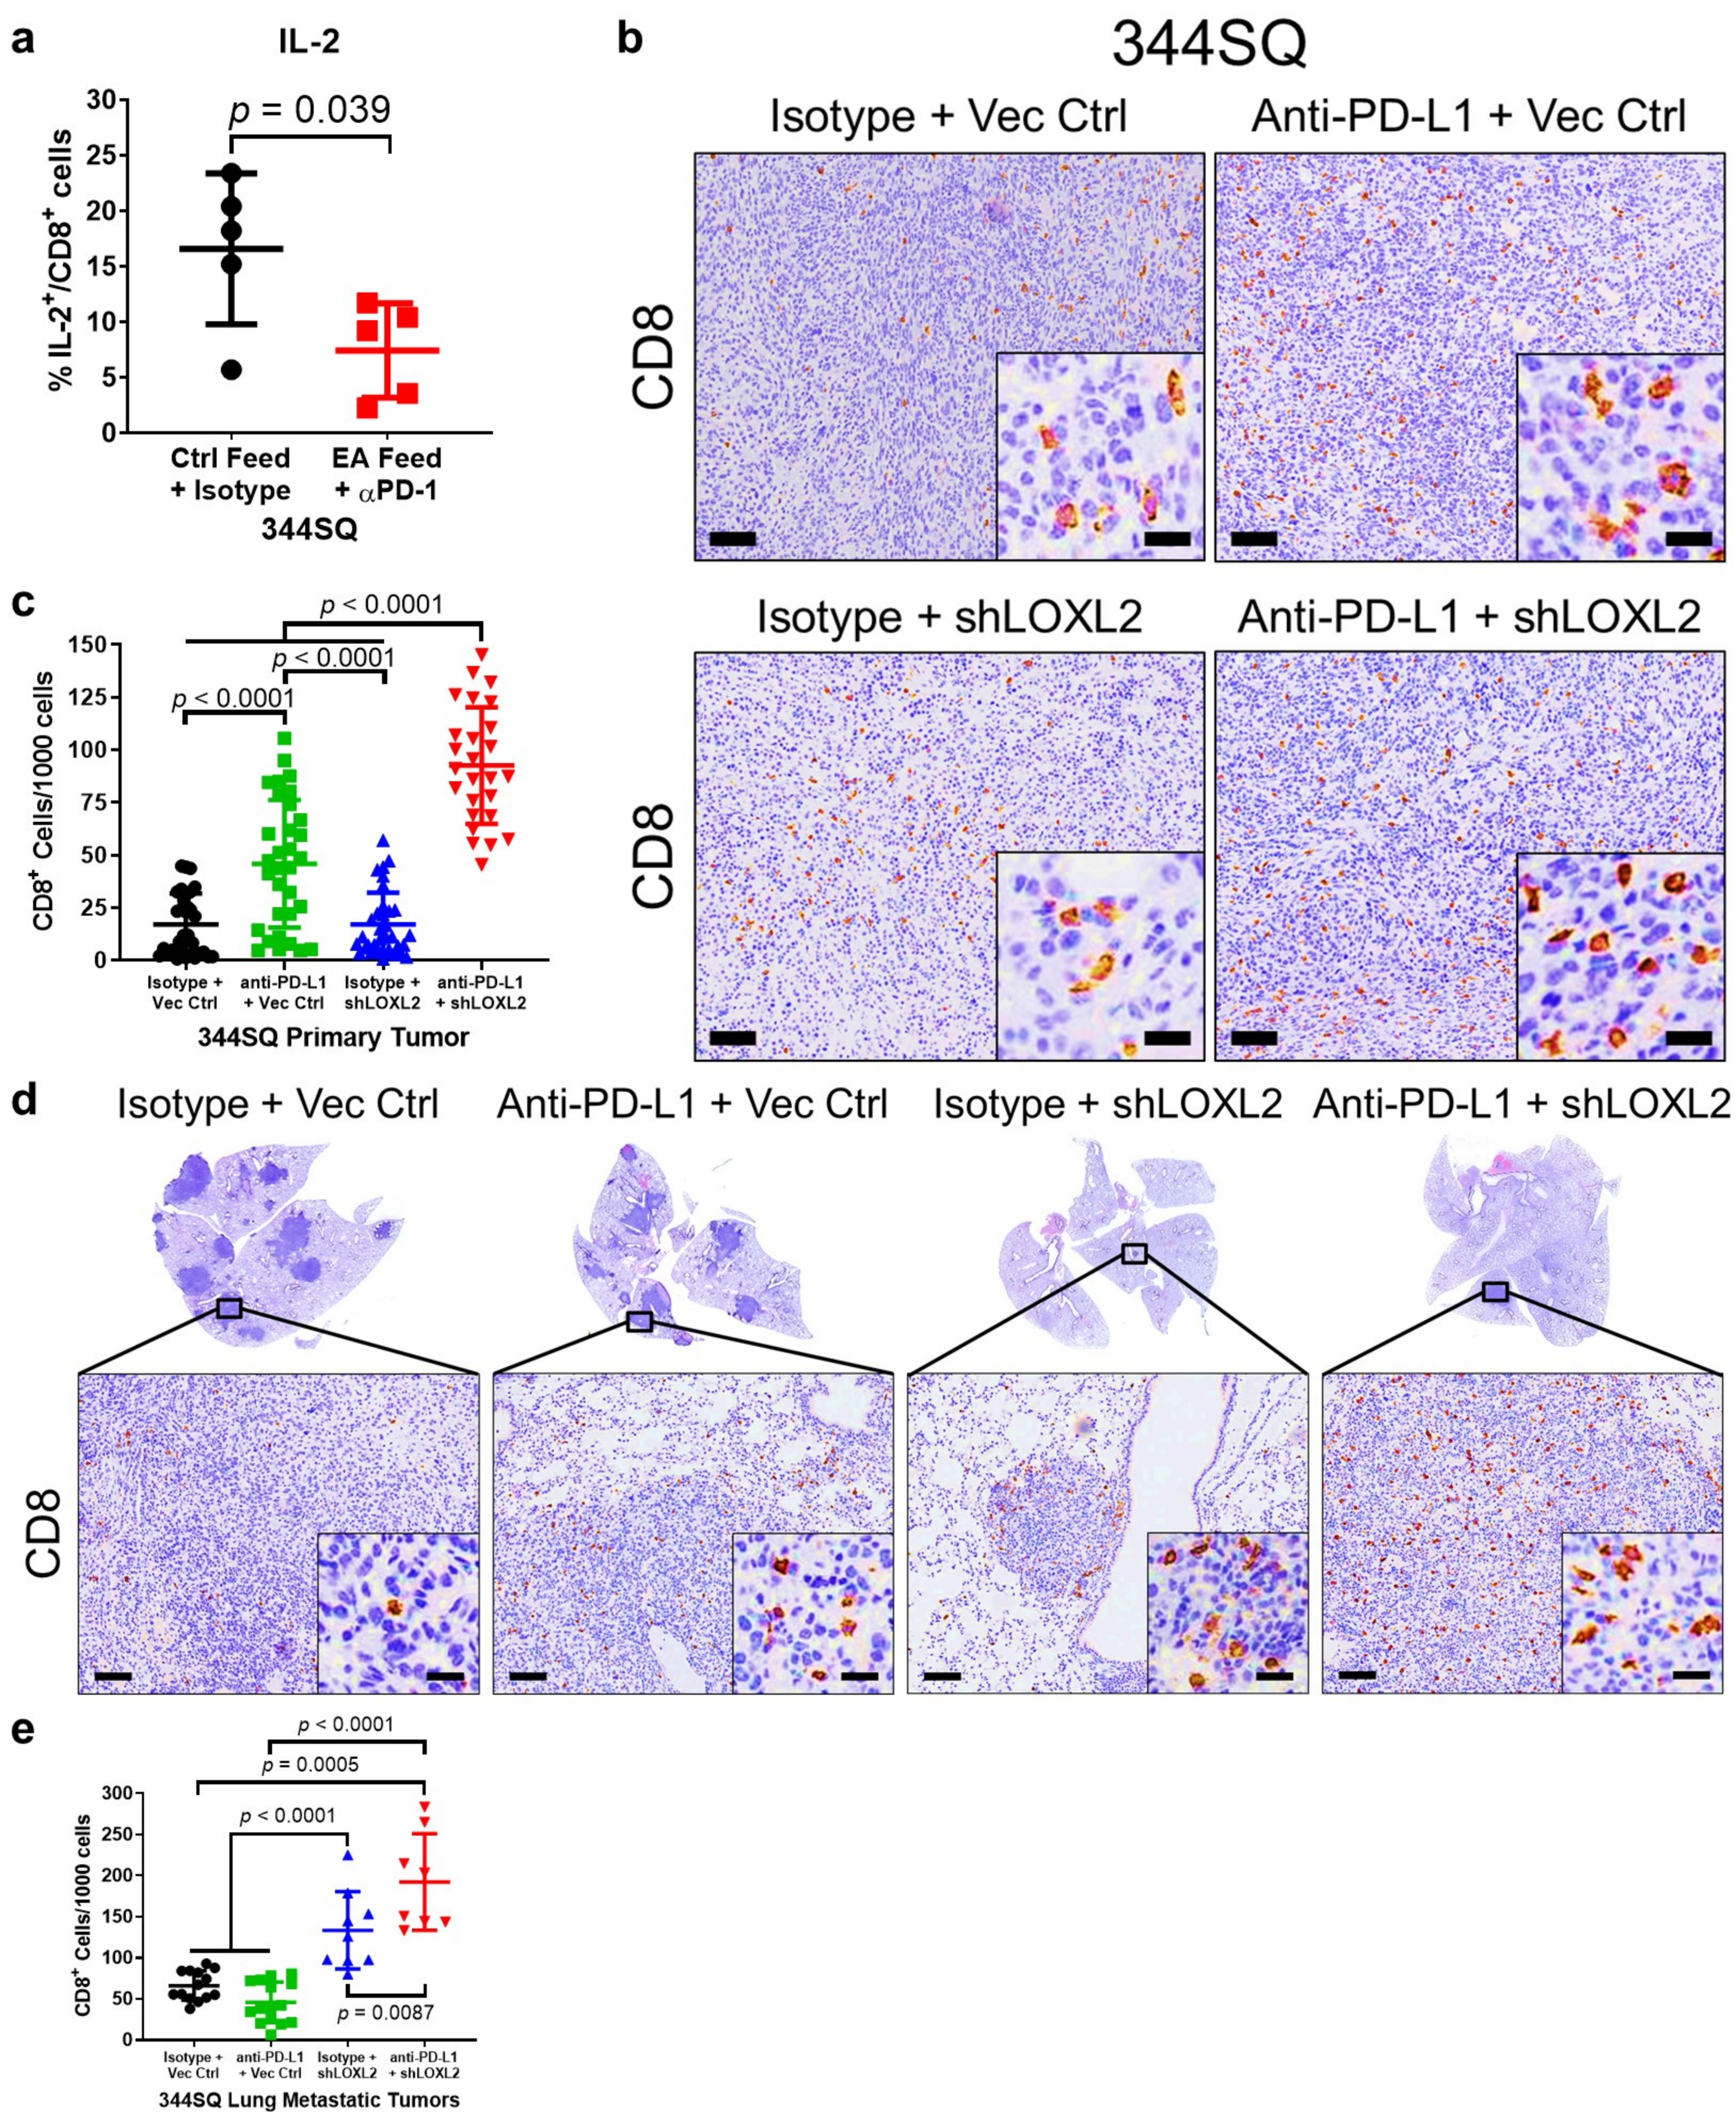



**Supplementary Figure 6. LOXL2 knockdown increases CD8 TILs in primary and metastatic lung tumors**

**(a)** FACS percentage of intracellular IL-2+ CD8+ TILs in tumor cell suspensions from experiment in Fig. 3d.

Statistics calculated using two-tailed student's t-test.

**(b – c)** Representative CD8 IHC stains **(b)** with quantification **(c)** of 344SQ primary tumor tissues from the experiment in Supplementary Figure 5a; n = 4 tumors per group, 8 fields quantified per sample (32 total fields) for Isotype + Vec Ctrl, anti-PD-L1 + Vec Ctrl, and Isotype + shLOXL2 groups; 28 total fields quantified for anti-PD-L1 + shLOXL2 group. Scale bars, 100  $\mu$ m. Inset scale bars, 20  $\mu$ m. Statistics calculated using one-way ANOVA post-hoc Tukey test.

**(d – e)** Representative CD8 IHC stains **(d)** with quantification **(e)** of metastatic lung tumor regions as denoted by black zoom box from the experiment in Supplementary Figure 5a; n = 4 lungs per group with 14 (Isotype + Vec Ctrl), 15 (anti-PD-L1 + Vec Ctrl), 9 (Isotype + shLOXL2), and 8 (anti-PD-L1 + shLOXL2) lung tumor fields quantified across all samples for respective groups. Scale bars, 100  $\mu$ m. Inset scale bars, 20  $\mu$ m. All data plots presented as mean +/- SD. Statistics calculated using one-way ANOVA post-hoc Tukey test.



Supplementary Figure 7. LOXL2 inhibition sensitizes LLC-JSP tumors to PD-L1 blockade

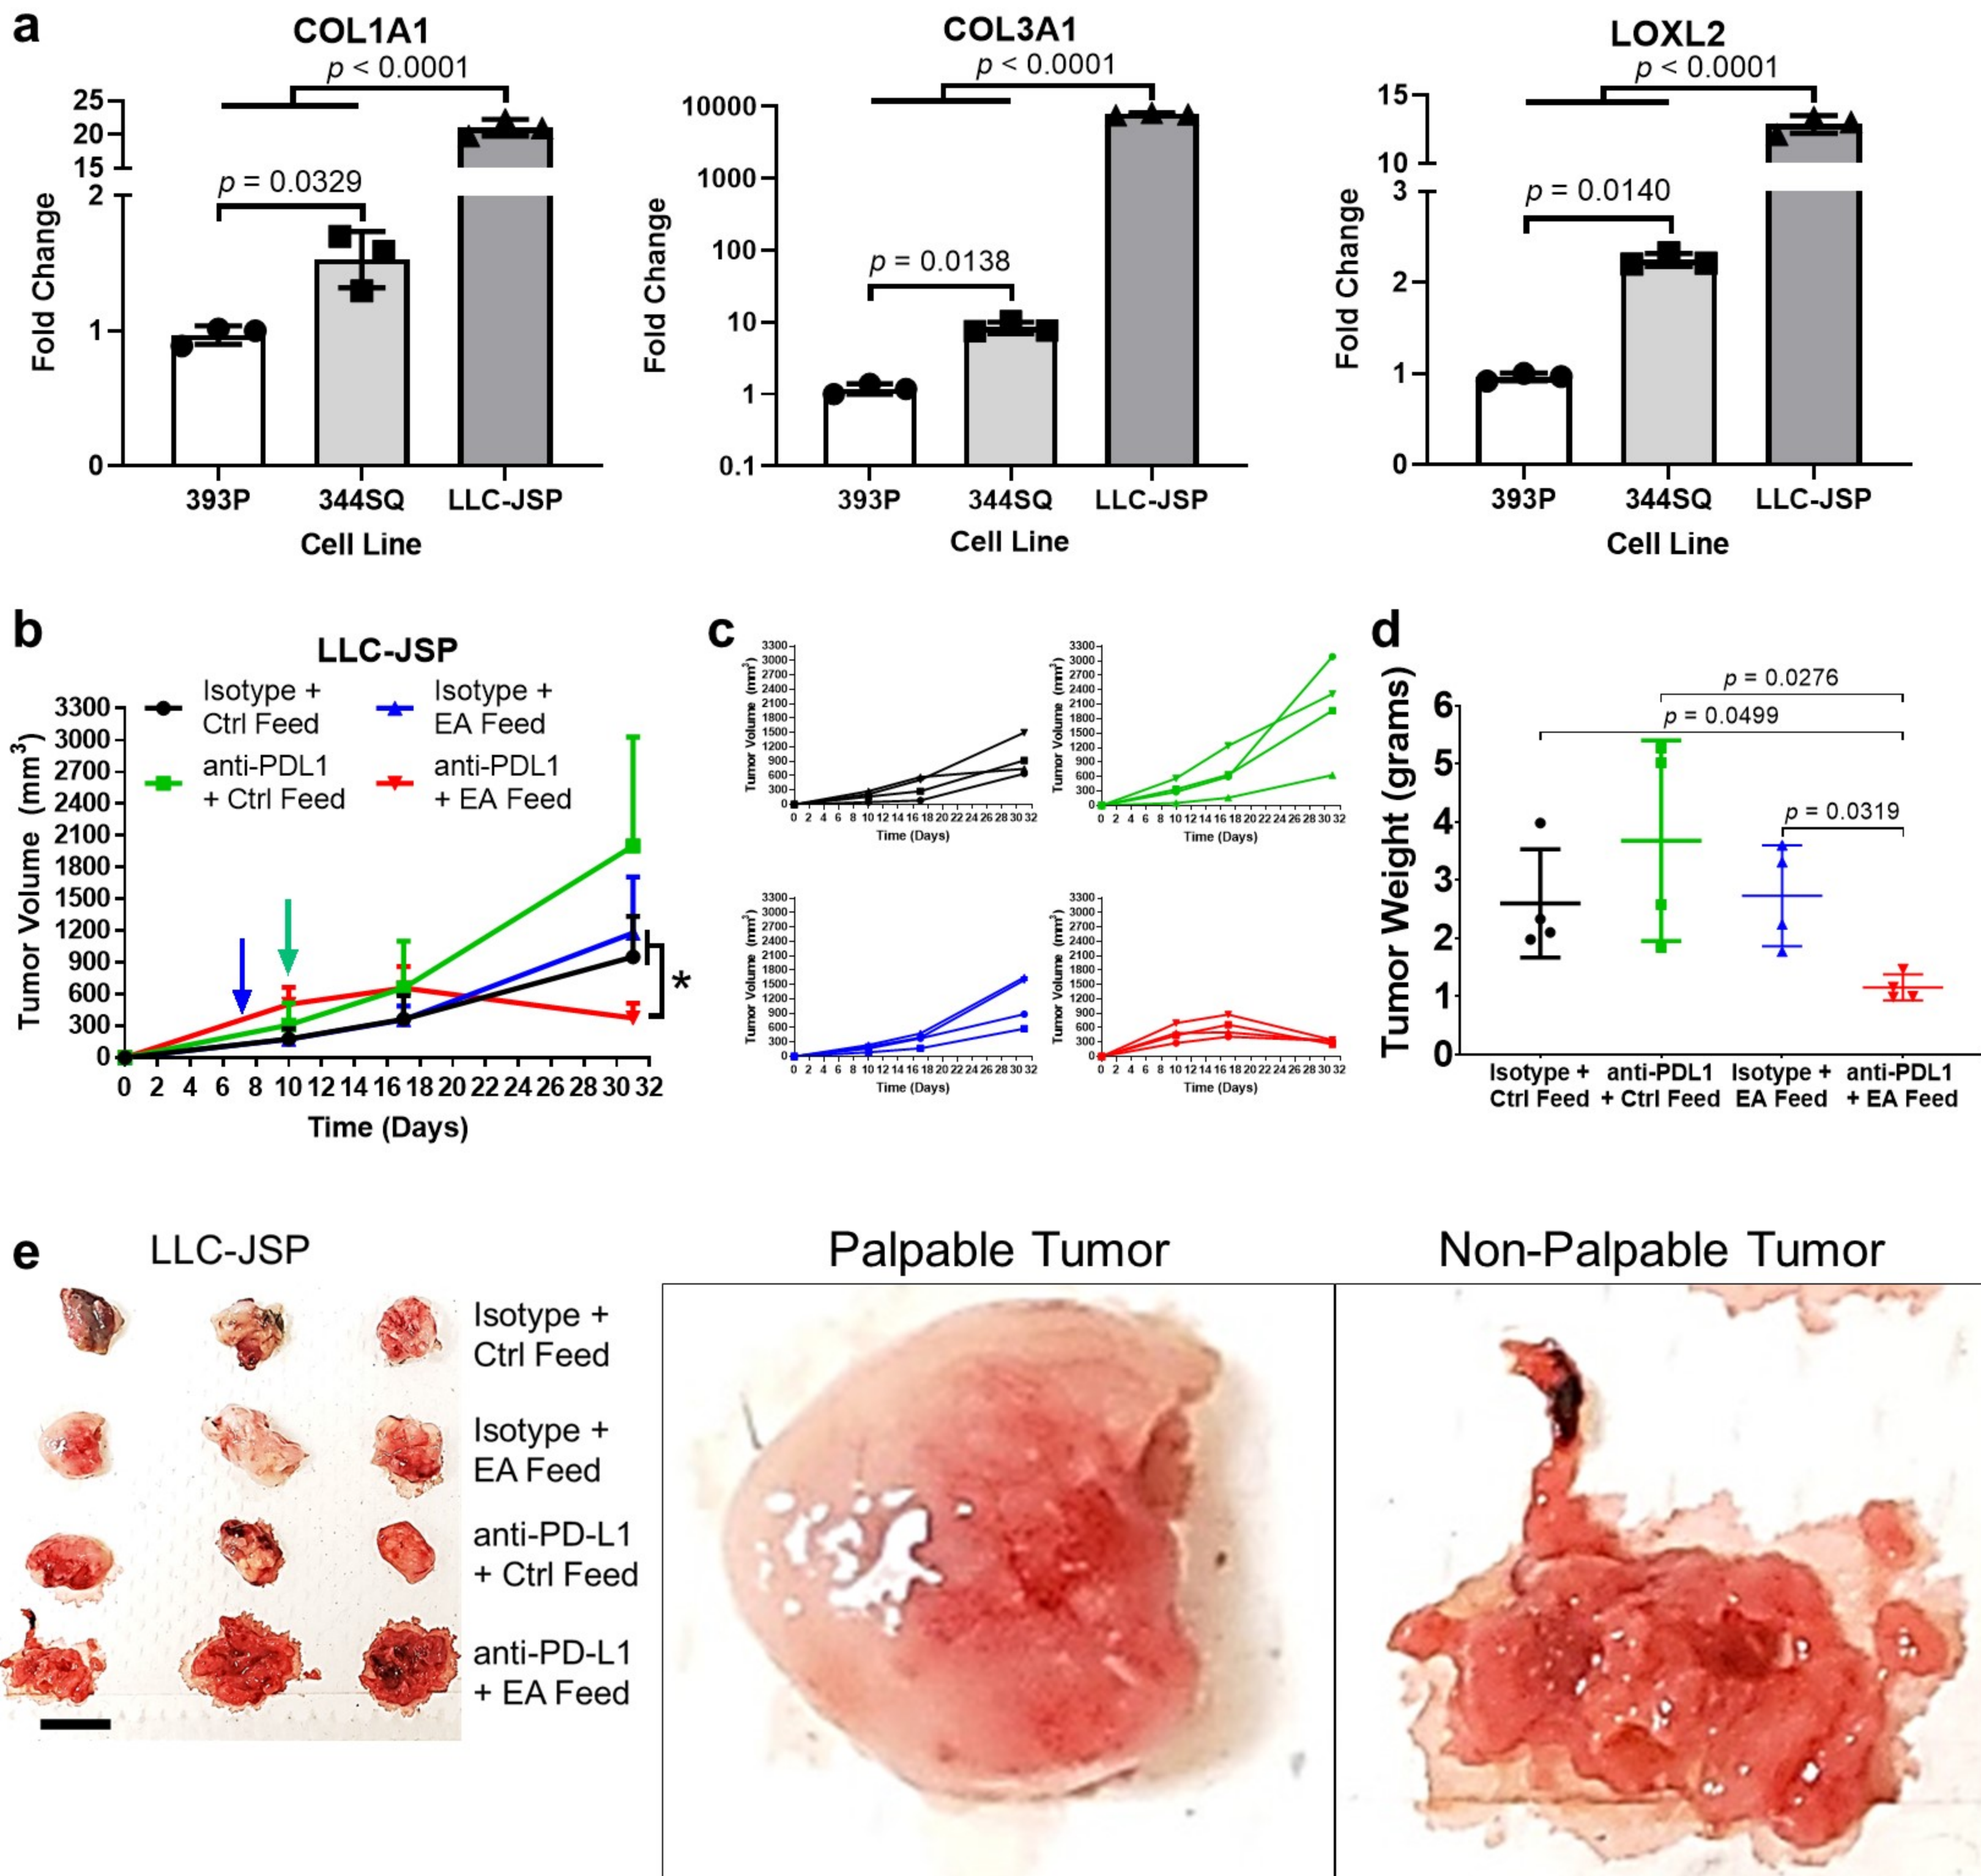

### **Supplementary Figure 7. LOXL2 inhibition sensitizes LLC-JSP tumors to PD-L1 blockade**

**(a)** QPCR analysis for relative expression of COL1A1, COL3A1, and LOXL2 in 393P, 344SQ, and Lewis lung cancer LLC-JSP cell lines; n = 3 replicates per group.

**(b)** Time point tumor volume measurements for LLC-JSP subcutaneous tumors in indicated treatment groups. Tumors were injected in the right flanks of immunocompetent, syngeneic WT BL/6 mice. Mice were given EA feed 1 week following tumor implantation as denoted by the blue arrow. When tumors reached ~150 to 200 mm<sup>3</sup>, anti-PD-L1 or isotype control was administered weekly (200 µg/mouse) by I.P. injection for 3 weeks as denoted by green arrow; n = 4 mice per treatment group.

**(c)** Tumor volume measurements for individual mice in each treatment group from the experiment in **(b)**.

**(d)** Final tumor weights of LLC-JSP tumors in indicated treatment groups from the experiment in **(b)**.

**(e)** Left: Images of three representative LLC-JSP primary subcutaneous tumors for each of the indicated treatment groups; n = 4 tumors per treatment group. Scale bar, 1 cm. Right: Enhanced representative images of palpable and non-palpable tumors from mice that received EA feed + isotype control or EA feed + anti-PD-L1, respectively. All data plots presented as mean +/- SD and statistics calculated using one-way ANOVA post-hoc Tukey test. \**p* < 0.05.



Supplementary Figure 8. Collagen reduces total CD8+ T cells and increases CD8+ T cell exhaustion and LAIR1 expression

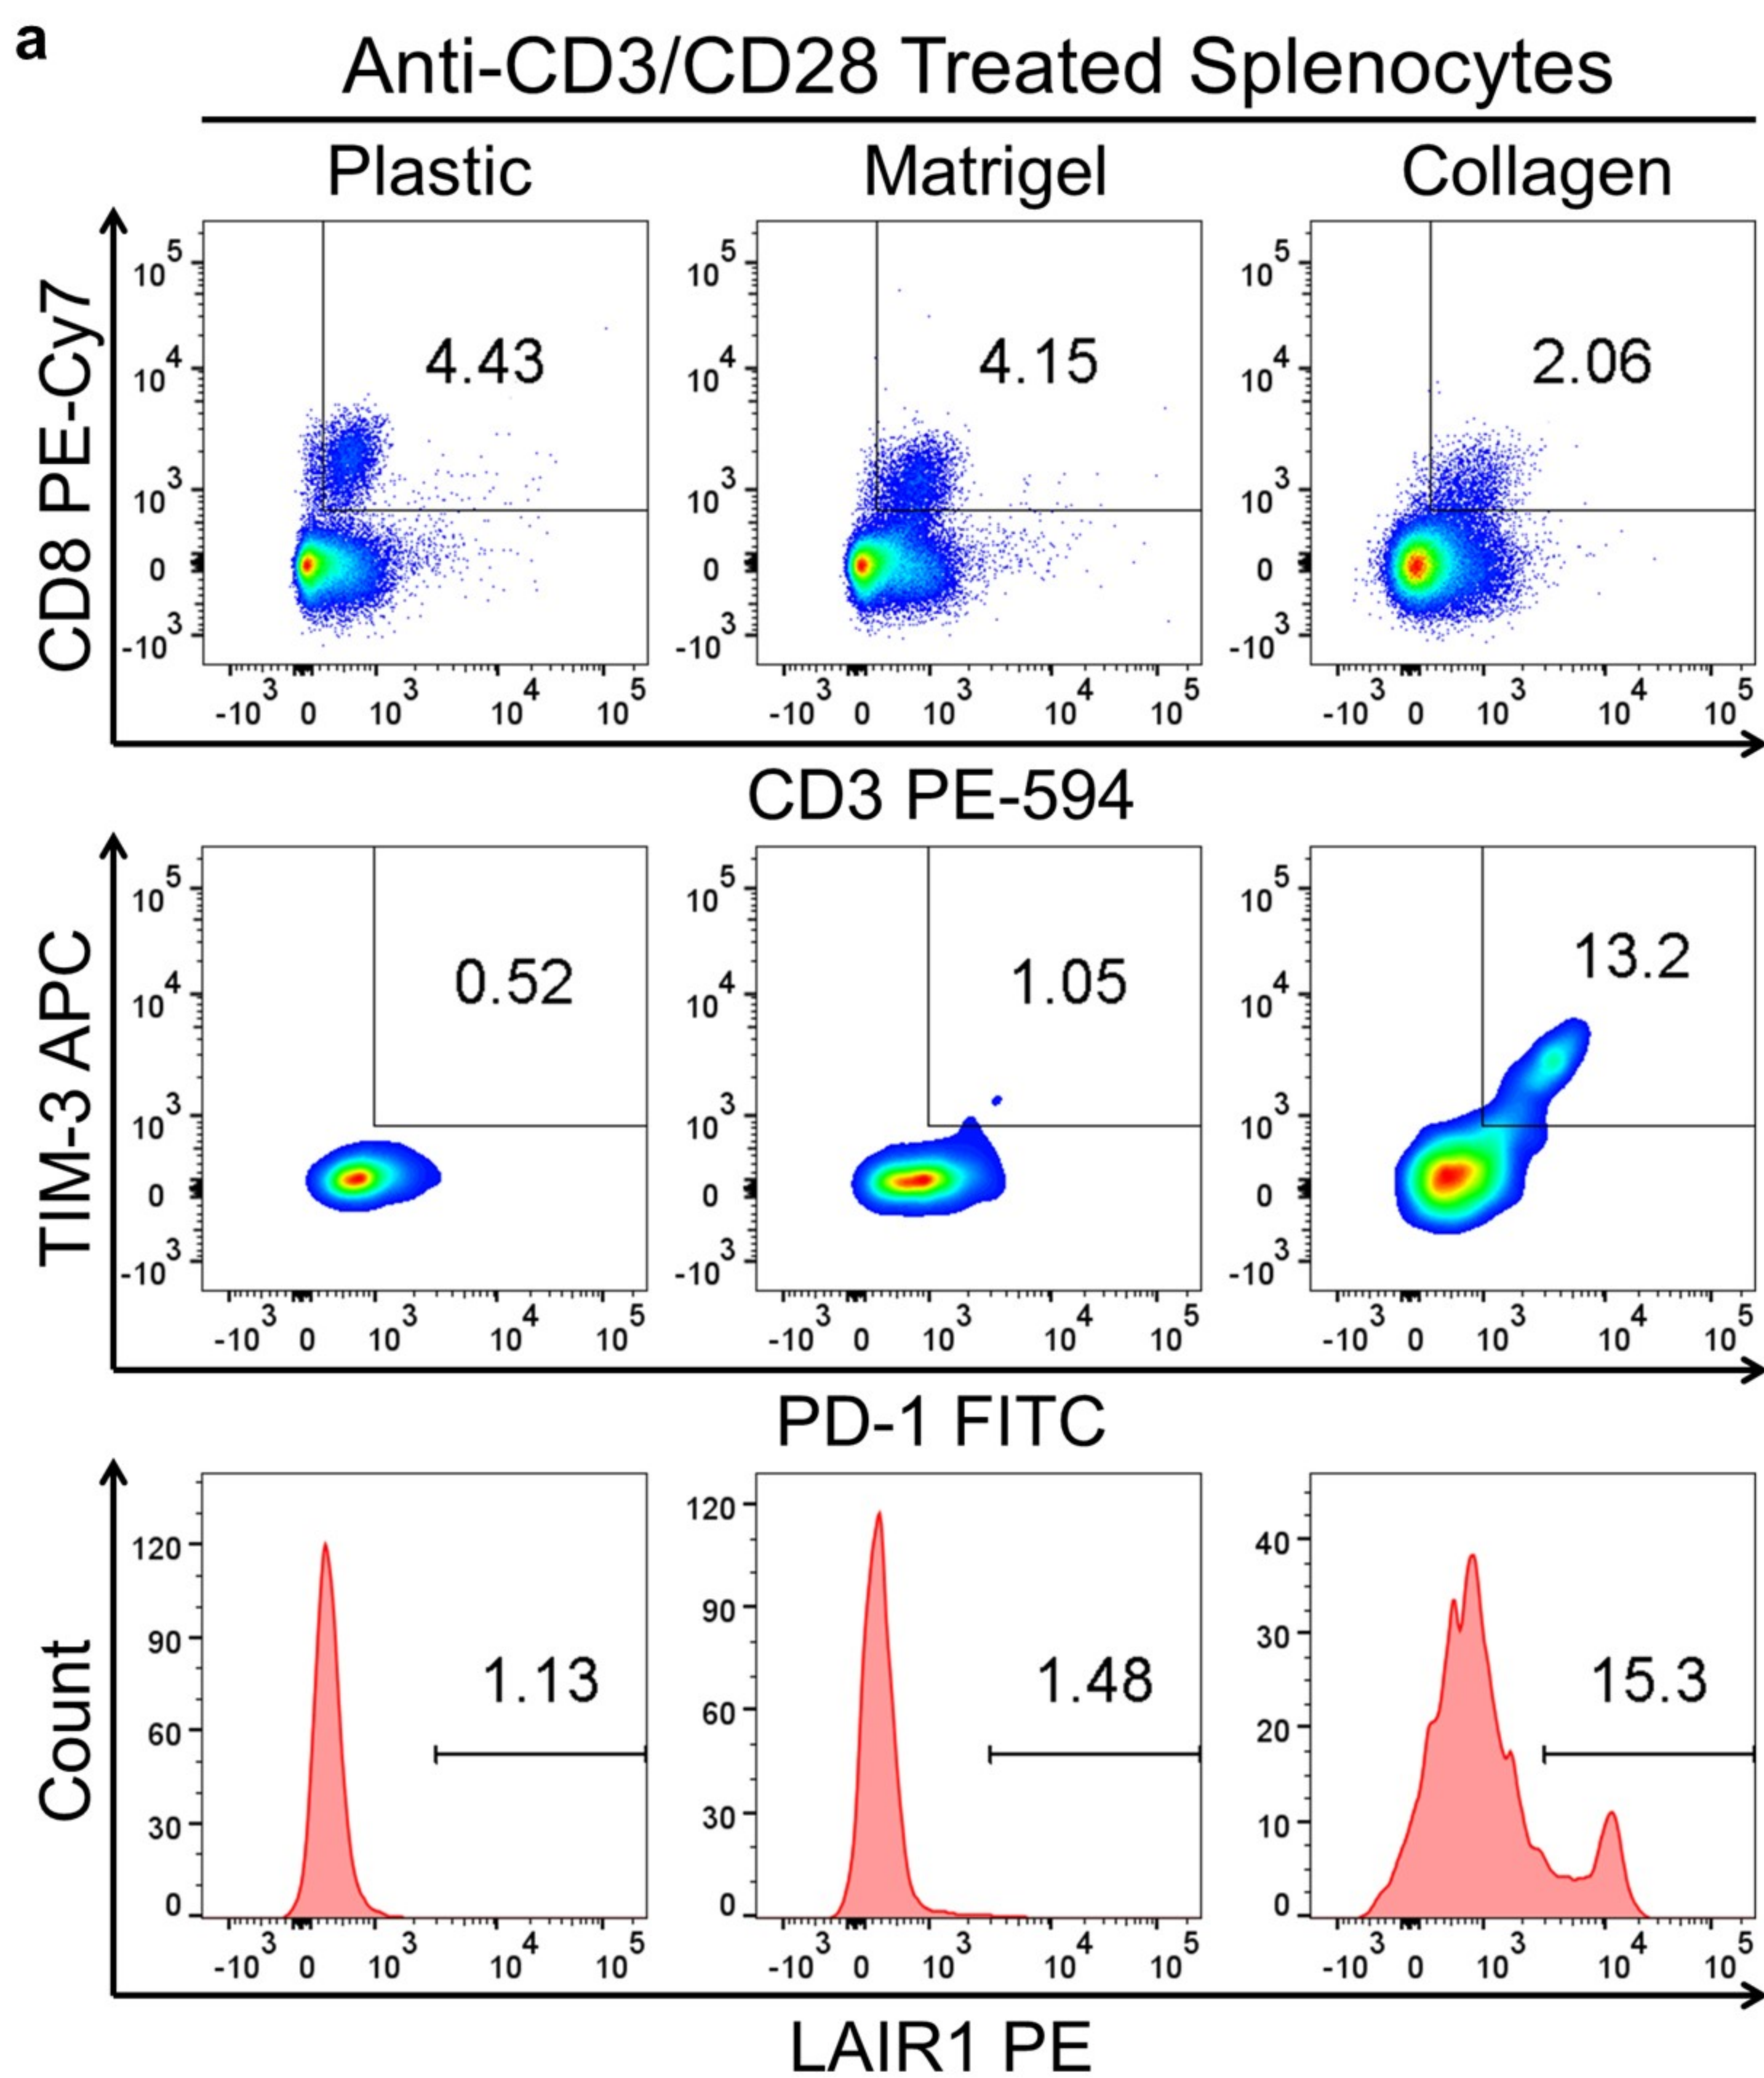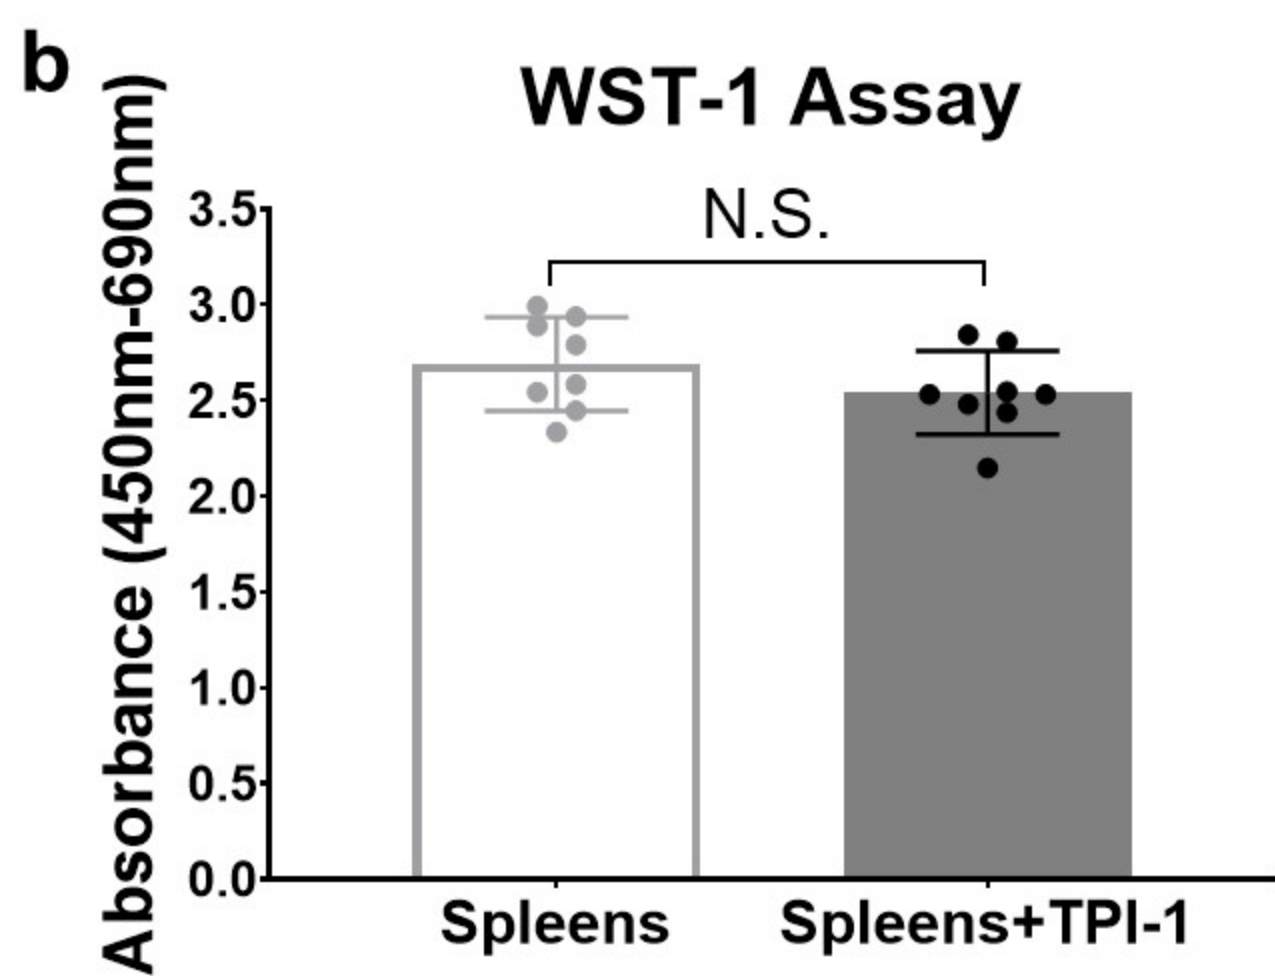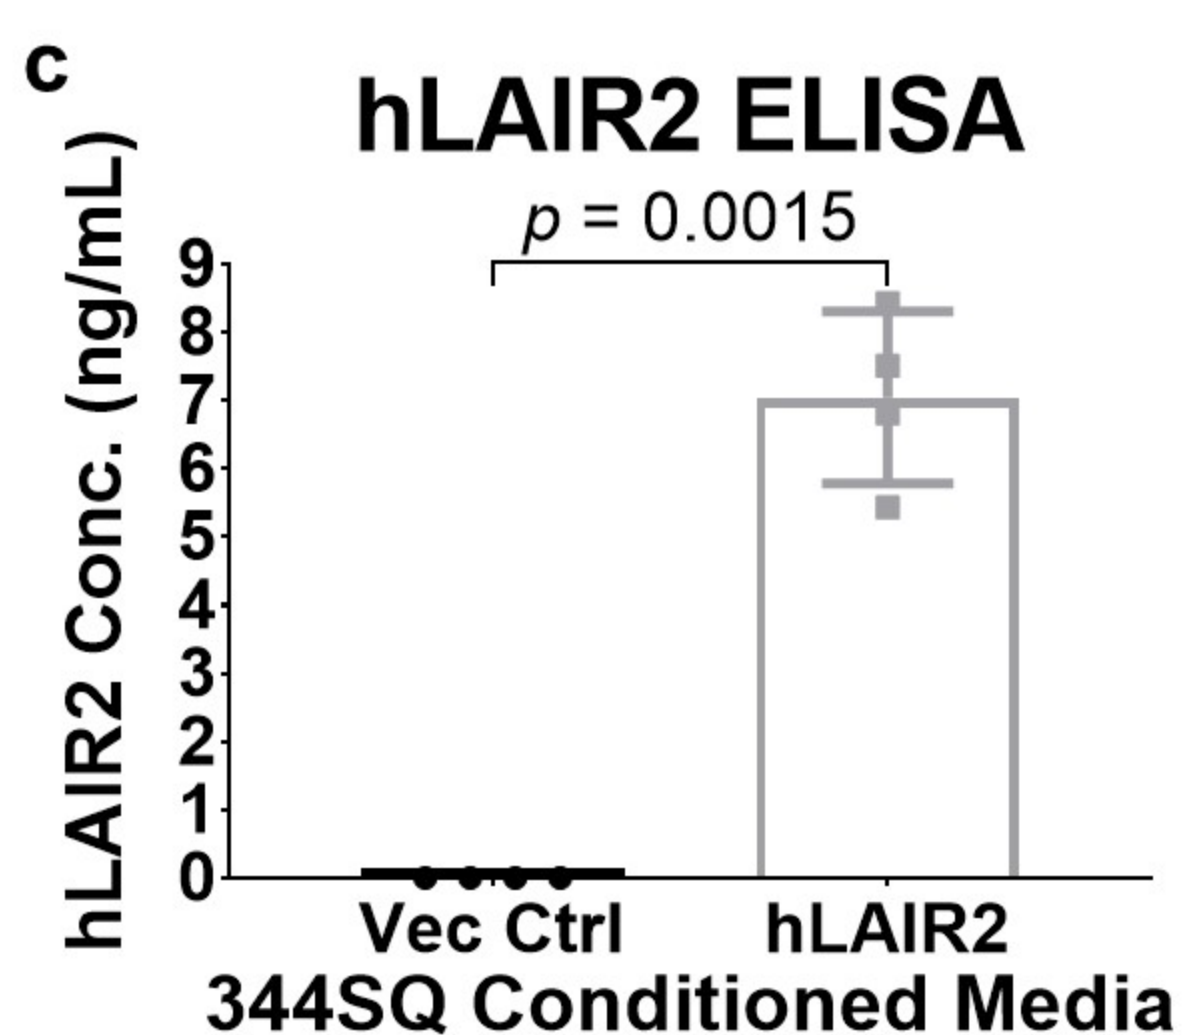

**Supplementary Figure 8. Collagen reduces total CD8<sup>+</sup> T cells and increases CD8<sup>+</sup> T cell exhaustion and LAIR1 expression**

**(a)** Representative FACS plots CD8<sup>+</sup> T cells gated from CD45<sup>+</sup>CD3<sup>+</sup> splenocytes co-cultured on plastic, laminin-rich Matrigel, or collagen for 96 hours. CD8<sup>+</sup> T cells were then gated for PD-1<sup>+</sup>TIM-3<sup>+</sup> exhaustion markers and LAIR1 expression and percentages were quantified in Fig. 4i – k.

**(b)** *In vitro* cell survival response of splenocytes after 72 hours of 20 μM SHP-1 (TPI-1) treatment. Cells were quantified using WST-1 reagent; n = 8 replicates per treatment group.

**(c)** LAIR2 ELISA for human LAIR2 (hLAIR2) concentration in conditioned media from 344SQ cells constitutively expressing LAIR2 or vector control; n = 4 independent samples. All data presented as mean +/- SD. Statistics calculated using two-tailed student's t-test.



Supplementary Figure 9. Lung cancer cell-induction of CD8<sup>+</sup> T cell exhaustion and LAIR1 expression is dependent on LOXL2 and SHP-1 signaling due to CD18 binding to collagen

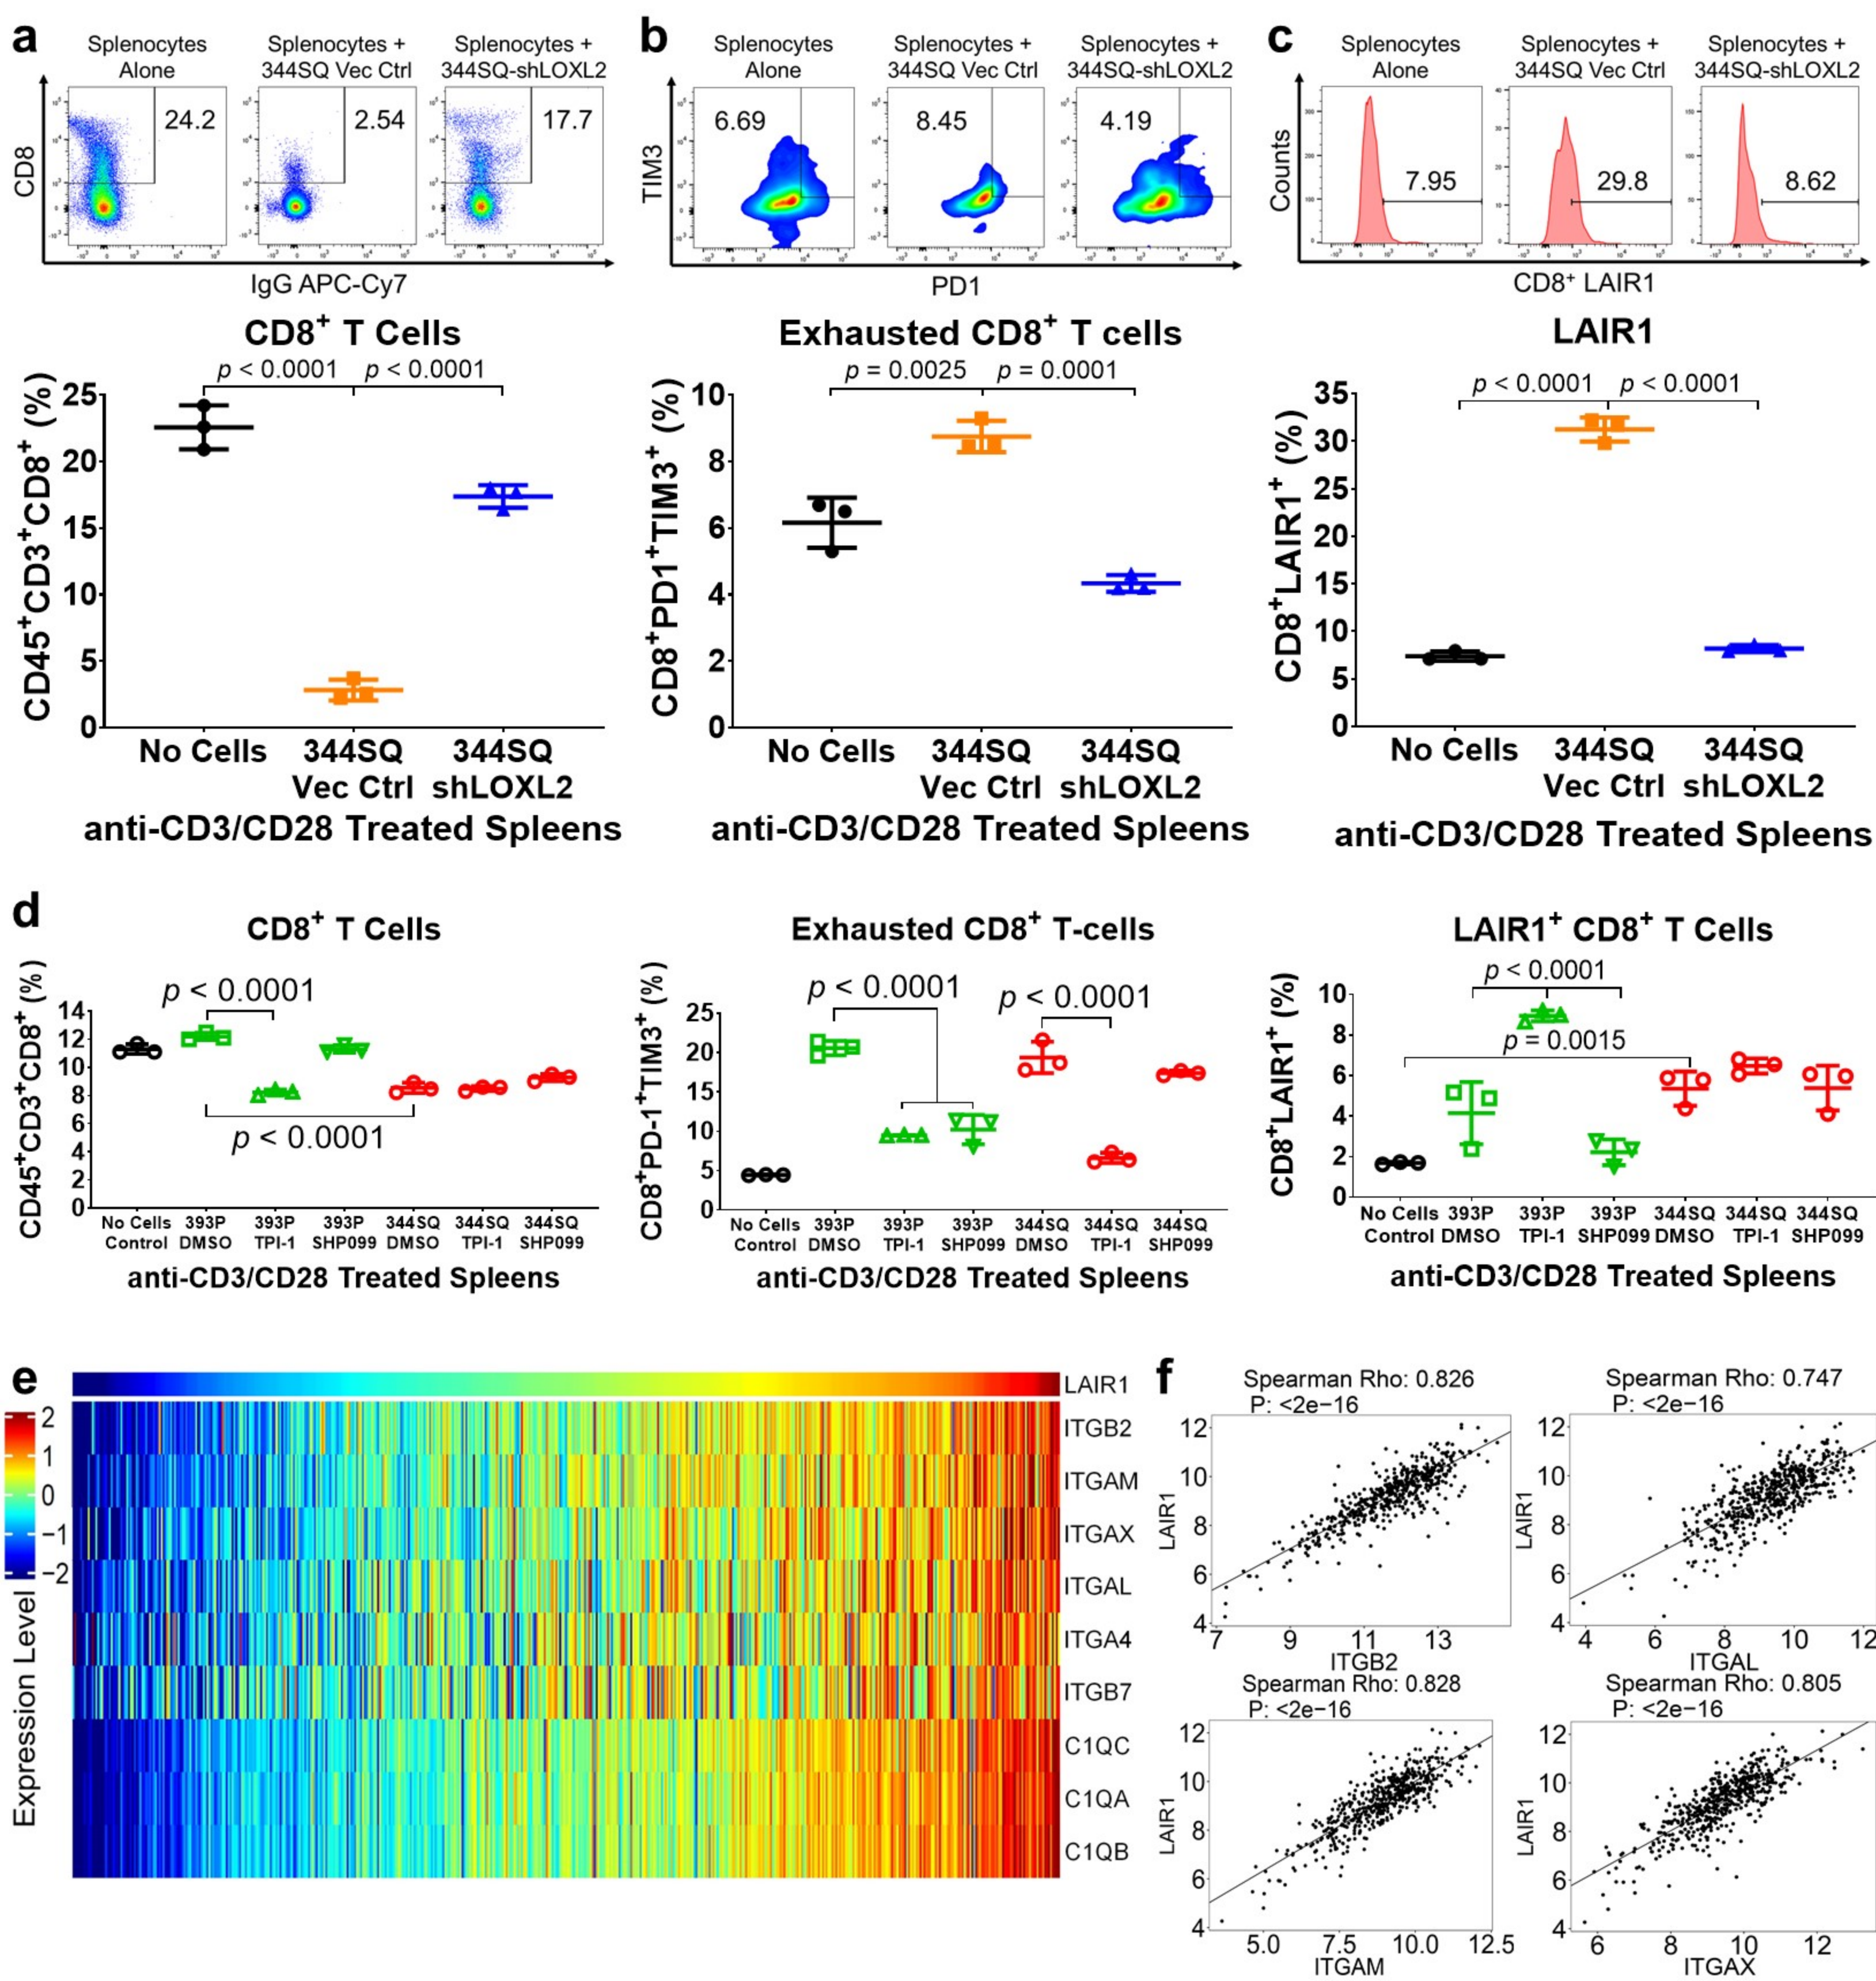



**Supplementary Figure 9. Lung cancer cell-induction of CD8<sup>+</sup> T cell exhaustion and LAIR1 expression is dependent on LOXL2 and SHP-1 signaling due to CD18 binding to collagen**

**(a)** Representative FACS plots and quantification of percentage of total CD8<sup>+</sup> T cells gated from CD45<sup>+</sup>CD3<sup>+</sup> splenocytes in *in vitro* culture alone or in co-culture with 344SQ cells ± LOXL2 knockdown for 96 hours; n = 3 replicates per group. Data presented as mean +/- SD.

**(b)** Representative FACS plots and quantification of percentage of PD-1<sup>+</sup>TIM-3<sup>+</sup> exhaustion markers gated from total CD8<sup>+</sup> T cells in splenocytes cultured alone or co-cultured with 344SQ cells ± LOXL2 knockdown for 96 hours; n = 3 replicates per group. Data presented as mean +/- SD.

**(c)** Representative FACS plots and quantification of percentage of LAIR1<sup>+</sup> cells gated from CD8<sup>+</sup> T cells in splenocytes cultured alone or co-cultured with 344SQ cells ± LOXL2 knockdown for 96 hours; n = 3 replicates per group. Data presented as mean +/- SD.

**(d)** FACS percentage of total CD8<sup>+</sup> T cells, PD-1<sup>+</sup>TIM-3<sup>+</sup> exhausted CD8<sup>+</sup> T cells, and LAIR1<sup>+</sup> CD8<sup>+</sup> T cells in splenocytes cultured alone or co-cultured with 393P and 344SQ cells treated with DMSO, 10 μM TPI-1, or 20 μM SHP099 for 96 hours; n = 3 replicates per group. Data presented as mean +/- SD. Statistics calculated using one-way ANOVA post-hoc Tukey's test.

**(e)** Heatmap showing association of mRNA expression in TCGA LUAD dataset between LAIR1 and collagen receptor genes that are statistically significant (P < 0.05) by Spearman's rank correlation.

**(f)** Representative cluster plot analysis of Spearman's rank correlation between ITGB2, ITGAL, ITGAM, and ITGAX versus LAIR1 mRNA expression in TCGA LUAD dataset.



Supplementary Figure 10. Combination of PD-1 blockade with LAIR2 overexpression or SHP-1 inhibition reduces lung tumor growth and metastasis

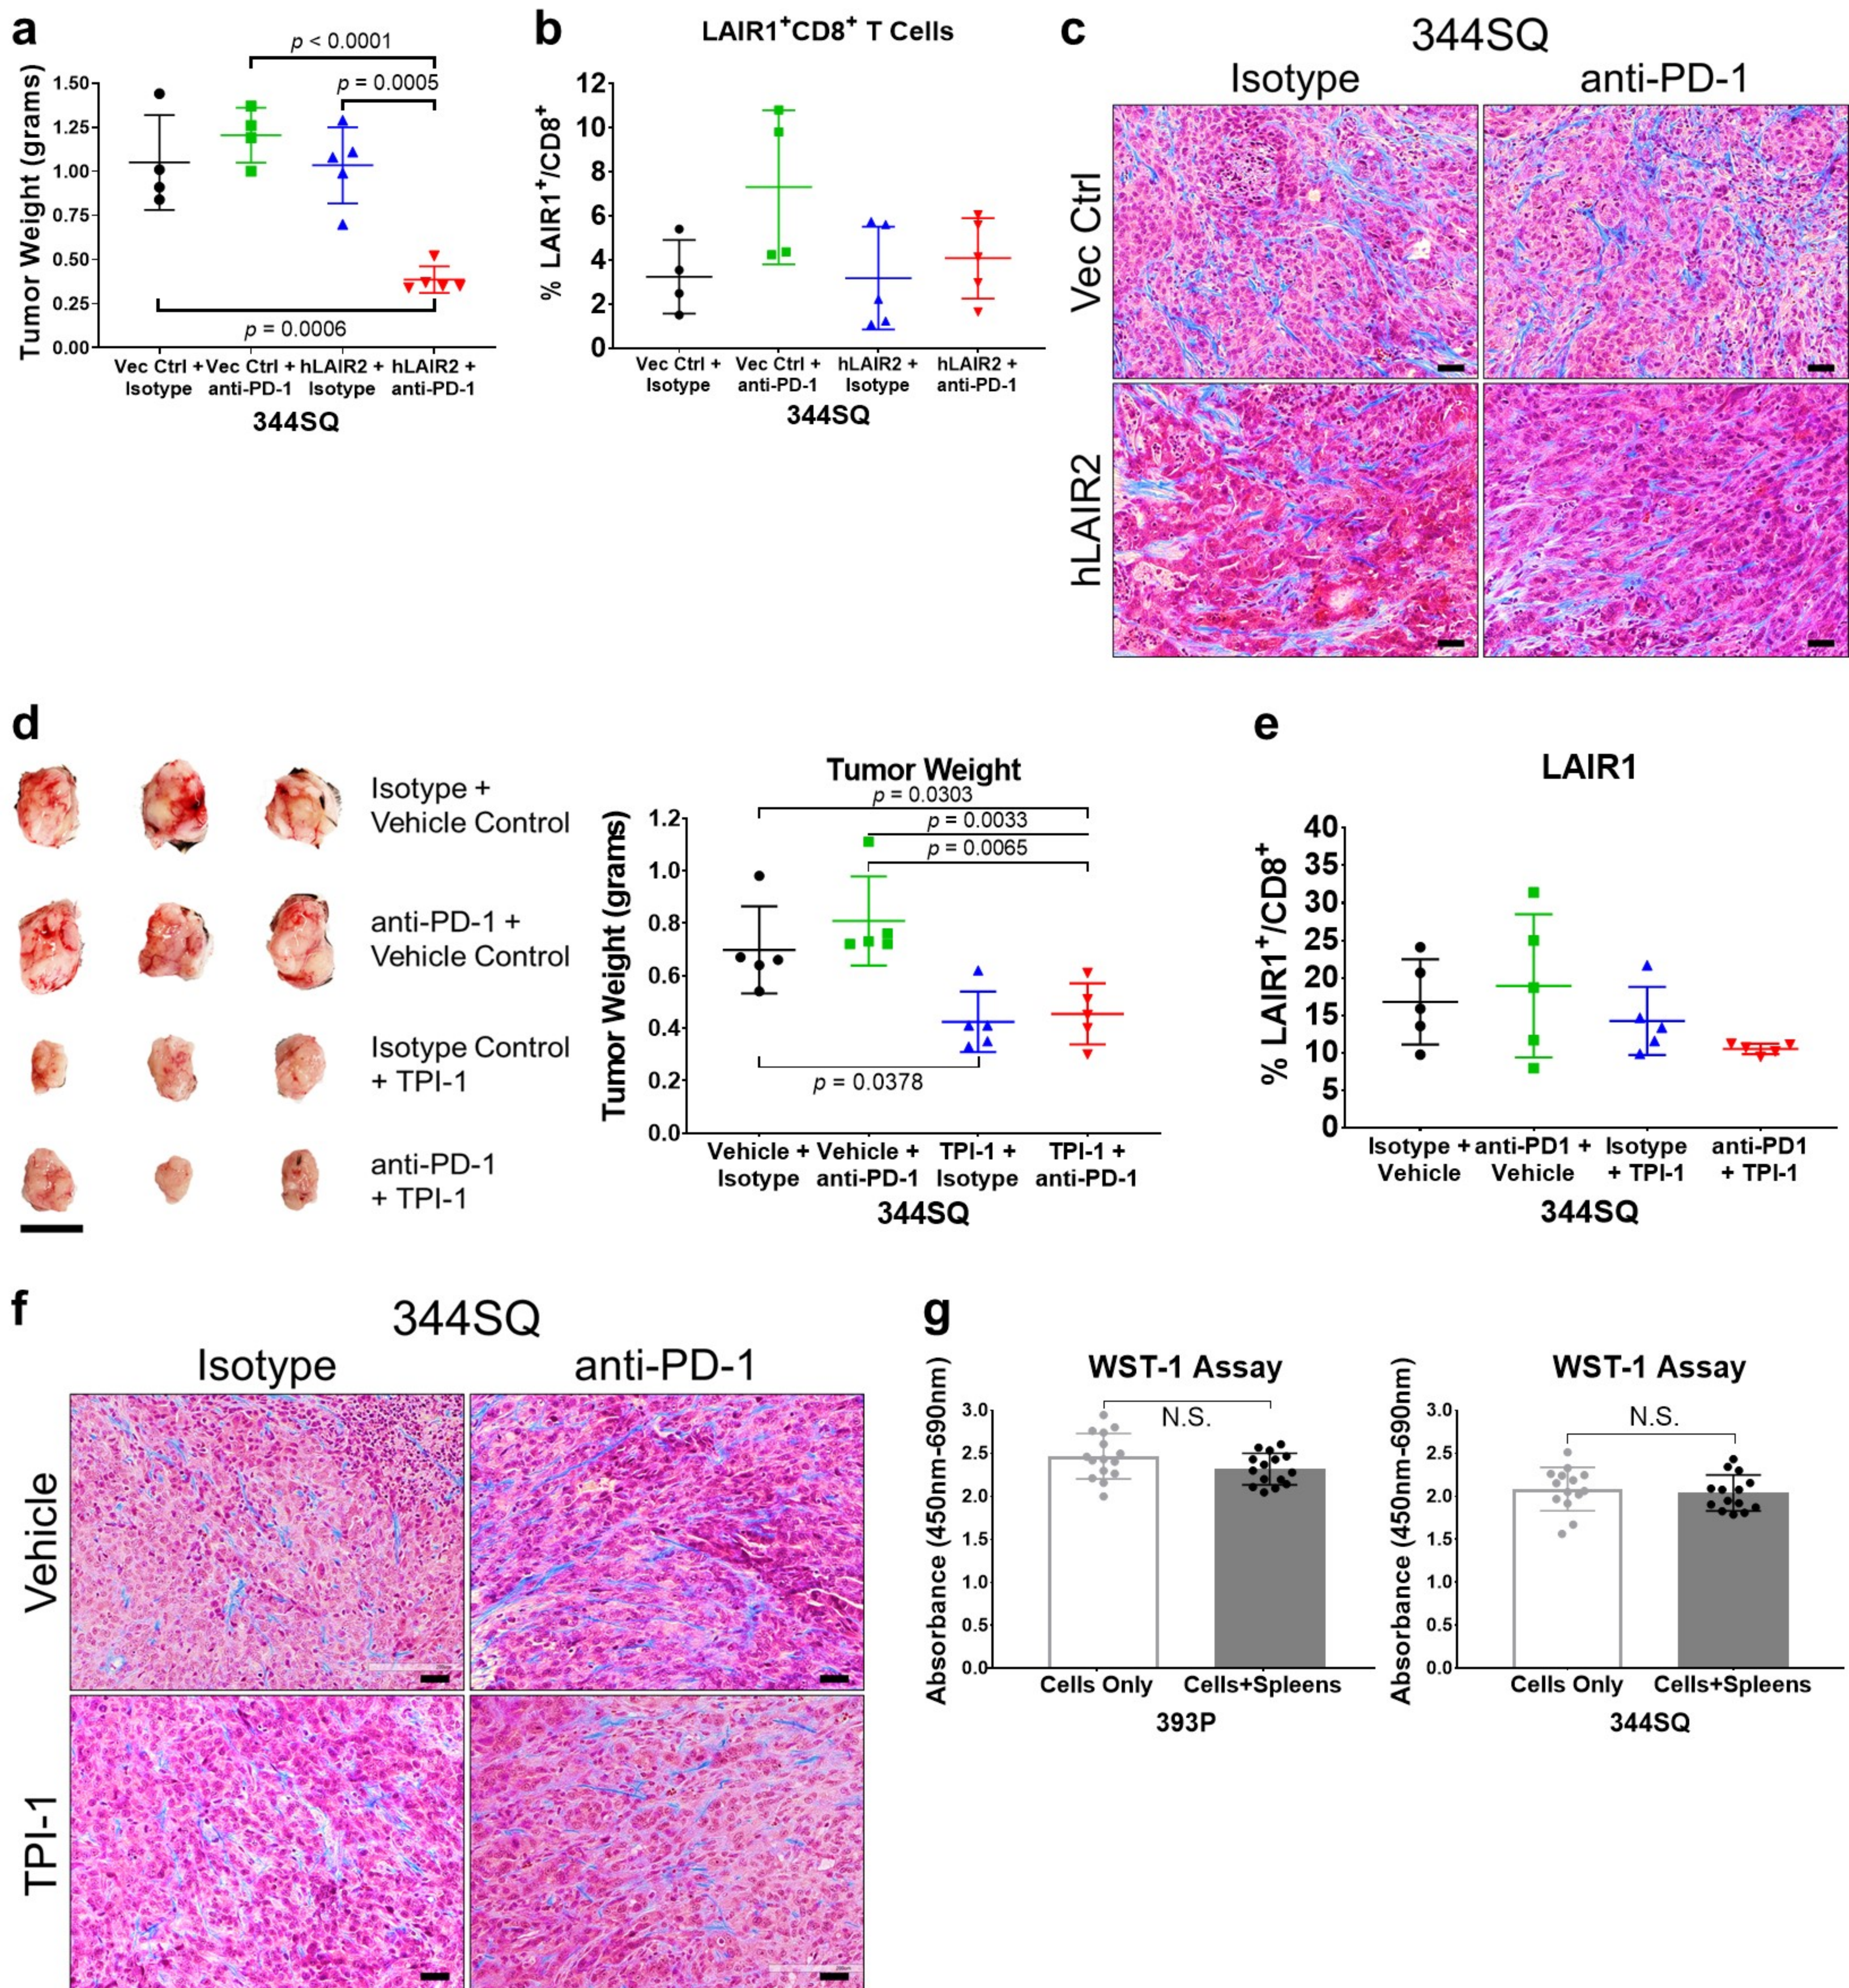



**Supplementary Figure 10. Combination of PD-1 blockade with LAIR2 overexpression or SHP-1 inhibition reduces lung tumor growth and metastasis**

**(a)** Final tumor weights of 344SQ tumors in specified treatment groups from the experiment in Fig. 5a; n = 4 or 5 tumors in each treatment group as denoted by individual dots. Statistics calculated using one-way ANOVA post-hoc Tukey test.

**(b)** FACS quantification for percentage of LAIR1<sup>+</sup> expression gated from total CD8<sup>+</sup> T cells in specified 344SQ tumor cell suspensions from the experiment in Fig. 5a; n = 4 or 5 tumors in each treatment group as denoted by individual dots.

**(c)** Representative trichrome stains of 344SQ tumors with indicated treatment groups at the endpoint of the experiment from Fig. 5a; n = 5 tumors per treatment group. Scale bars, 50  $\mu$ m.

**(d)** Left: Images of three representative 344SQ primary subcutaneous tumors for each of the indicated treatment groups from the experiment in Fig. 6a. Right: Final tumor weights of 344SQ tumors in specified treatment groups from the experiment in Fig. 6a; n = 5 tumors in each treatment group. Statistics calculated using one-way ANOVA post-hoc Tukey test.

**(e)** FACS quantification for percentage of LAIR1<sup>+</sup> expression gated from total CD8<sup>+</sup> T cells in specified 344SQ tumor cell suspensions from the experiment in Fig. 6a; n = 5 tumors in each treatment group.

**(f)** Representative trichrome stains of 344SQ tumors in the indicated treatment groups at the endpoint of the experiment from Fig. 6a; n = 5 tumors per treatment group. Scale bars, 50  $\mu$ m.

**(g)** WST-1 signal from 393P and 344SQ cells in culture alone or in co-culture with splenocytes without drug treatment from experiment in Fig. 6f. All data presented as mean  $\pm$  SD. Statistics calculated using two-tailed student's t-test.



# Supplementary Figure 11. Human cancer patient mRNA expression dataset correlations and comparisons

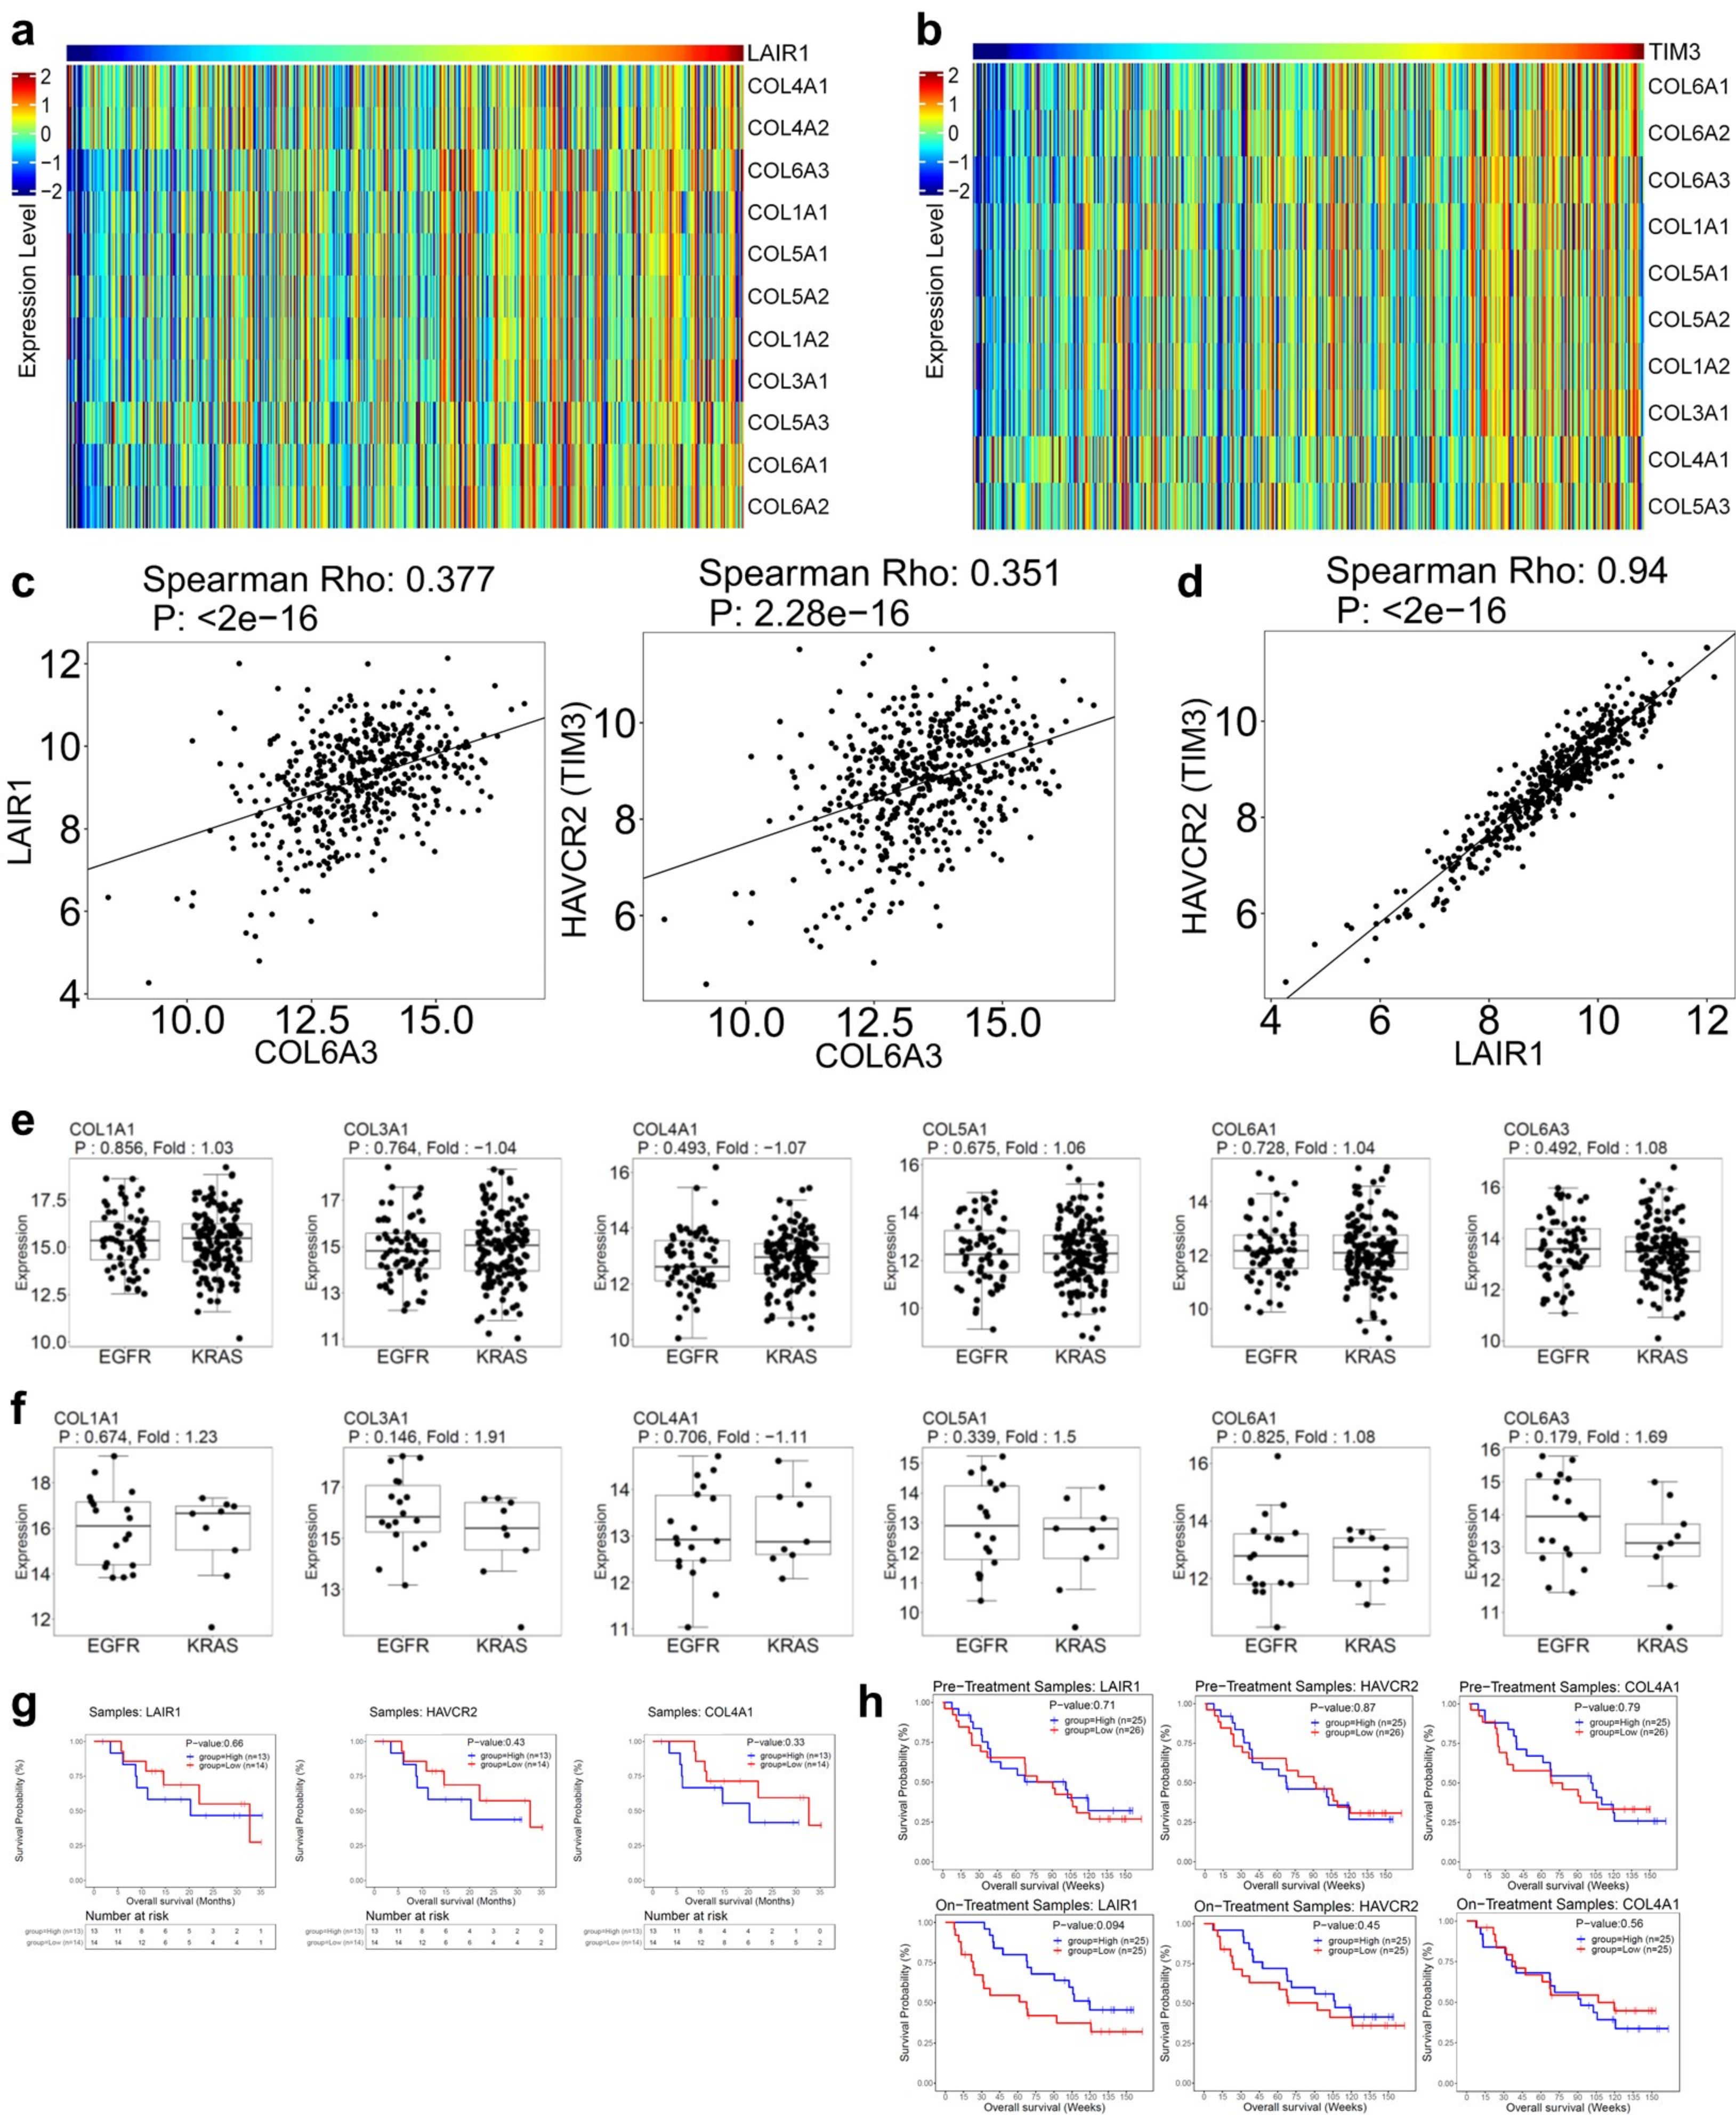



### **Supplementary Figure 11. TCGA lung cancer mRNA expression dataset correlations and comparisons**

**(a)** Heatmap showing association of mRNA expression in TCGA LUAD dataset between LAIR1 and collagen genes that are statistically significant ( $P < 0.05$ ) by Spearman's rank correlation.

**(b)** Heatmap showing association of mRNA expression in TCGA LUAD dataset between HAVCR2 (TIM-3) and collagen genes that are statistically significant ( $P < 0.05$ ) by Spearman's rank correlation.

**(c)** Representative cluster plot analysis of Spearman's rank correlation between COL6A3 versus LAIR1 or HAVCR2 (TIM-3) mRNA expression in TCGA LUAD dataset.

**(d)** Cluster plot analysis of Spearman's rank correlation between LAIR1 versus HAVCR2 (TIM-3) mRNA expression in TCGA LUAD dataset.

**(e – f)** Comparison of mRNA expression of indicated collagen isoforms between mutant EGFR vs KRAS LUAD **(e)** and LUSC **(f)** TCGA datasets. LUAD mutant EGFR sample size  $n = 114$  and mutant KRAS sample size  $n = 158$  independent patient samples. LUSC mutant EGFR sample size  $n = 18$  and mutant KRAS sample size  $n = 9$  independent patient samples. Boxplots shown as the median  $\pm 1$  quartile, with whiskers extending to the most extreme data point within 1.5 interquartile range from the box boundaries.

**(g)** Kaplan-Meier curves predicting survival of melanoma patients receiving anti-PD-1 therapy from the dataset published by Hugo et al based on net mRNA level changes in LAIR1, HAVCR2 (TIM3), and a representative collagen gene (COL4A1) in pre-treatment biopsy samples.

**(h)** Kaplan-Meier curves predicting survival of melanoma patients receiving anti-PD-1 therapy from the dataset published by Riaz et al based on net mRNA level changes in LAIR1, HAVCR2 (TIM3), and a representative collagen gene (COL4A1) in pre- and on-treatment biopsy samples.



## Supplementary Methods

### Mouse LOXL2 shRNA Primers:

| Primer               | Sequence                                                                  |
|----------------------|---------------------------------------------------------------------------|
| mLOXL2-shRNA Forward | 5'-TCGAGGCAACATGCTCTATCGGTTGTTGCGGCCGACACAACCGATAGAGAGCATGTTGCCTTTTG-3'   |
| mLoxL2-shRNA Reverse | 5'-CGCGCAAAAAGGCAACATGCTCTATCGGTTGTCTGCGGCCGCAACAACCGATAGAGAGCATGTTGCC-3' |

### Human LAIR2 cDNA Primers for ectopic experiments:

| Primer         | Sequence                                      |
|----------------|-----------------------------------------------|
| hLAIR2-BamHI-F | 5'- gggaccggatccATGTCTCCACACCTCACTGCTCT-3'    |
| hLAIR2-XhoI-R  | 5'- ATTTCTctcgagTCATGGTGCATCAAATCCGGAGGCTT-3' |

### QPCR Primers:

| Primer      | 5'-Sequence-3'          |
|-------------|-------------------------|
| mLOXL2-5'   | TTCTGCCTGGAGGACACTGAGT  |
| mLOXL2-3'   | TCGGTGATGTCTATCCACTGGC  |
| mCol1a1-F-1 | CCTCAGGGTATTGCTGGACAAC  |
| mCol1a1-R-1 | CAGAAGGACCTTGTGGCCAGG   |
| mCol3a1-F-1 | GACCAAAAGGTGATGCTGGACAG |
| mCol3a1-R-1 | CAAGACCTCGTGCTCCAGTTAG  |
| mL32-F      | GGAGAAGGTTCAAGGGCCAG    |
| mL32-R      | TGCTCCATAACCGATGTGT     |

### Antibodies:

| Antigen                    | Vendor            | Catalog Number  | Application | Dilution |
|----------------------------|-------------------|-----------------|-------------|----------|
| Mouse/Human LOXL2          | R&D Systems       | AF2639          | WB          | 1:250    |
| Collagen I                 | Abcam             | ab34710         | WB          | 1:500    |
| $\beta$ -Actin             | Sigma-Aldrich     | A1978           | WB          | 1:5000   |
| Mouse LOXL2                | Santa Cruz        | sc-66950 (H-65) | IHC         | 1:200    |
| CD8                        | Cell Signaling    | 98941           | IHC         | 1:100    |
| CD45 Pacific Blue          | Biologend         | 103126          | FACS        | 1:100    |
| CD3 PE-594                 | Biologend         | 100246          | FACS        | 1:100    |
| CD4 APC-Cy7                | Biologend         | 100526          | FACS        | 1:100    |
| CD8 PE-Cy7                 | Biologend         | 100721          | FACS        | 1:200    |
| CD44 BV711                 | Biologend         | 103057          | FACS        | 1:100    |
| CD62L FITC                 | Tonbo Biosciences | 35-0621-U500    | FACS        | 1:100    |
| CD69 BV650                 | Biologend         | 104541          | FACS        | 1:100    |
| PD-1 BV605                 | Biologend         | 135220          | FACS        | 1:100    |
| TIM-3 APC                  | Biologend         | 134007          | FACS        | 1:100    |
| LAIR1 PE                   | Invitrogen        | 12-3051-82      | FACS        | 1:100    |
| Live/Dead Ghost Violet 510 | Tonbo Biosciences | 13-0870-T100    | FACS        | 1:500    |
| ICOS (CD278) BV786         | Biologend         | 313510          | FACS        | 1:100    |
| CD25 BV395                 | Biologend         | 564022          | FACS        | 1:100    |
| FOXP3 PerCP-Cy5.5          | Invitrogen        | 45-5773-82      | FACS        | 1:100    |
| CD11b BV650                | Biologend         | 101239          | FACS        | 1:100    |



|                  |                   |              |      |       |
|------------------|-------------------|--------------|------|-------|
| CD11c BV785      | Biologend         | 117335       | FACS | 1:100 |
| GR-1 BV711       | Biologend         | 108443       | FACS | 1:100 |
| F4/80 APC        | Tonbo Biosciences | 20-4801-U100 | FACS | 1:100 |
| MHCII PE-Cy7     | Biologend         | 107629       | FACS | 1:100 |
| CD45 PerCP-Cy5.5 | Biologend         | 103132       | FACS | 1:100 |
| PD-1 FITC        | Biologend         | 135214       | FACS | 1:100 |
| IL-2 BV605       | Biologend         | 503829       | FACS | 1:100 |
| IFN- $\gamma$ PE | Biologend         | 505808       | FACS | 1:100 |
|                  |                   |              |      |       |

IHC Antibodies for Human Tissues:

| <b>Biomarker</b>            | <b>Clone</b> | <b>Vendor</b>     | <b>Catalogue #</b> | <b>Antigen Retrieval</b>                     | <b>Dilution</b> |
|-----------------------------|--------------|-------------------|--------------------|----------------------------------------------|-----------------|
| Collagen type I<br>(COL1A1) | E8I9Z        | Cell Signaling    | 91144              | Epitope Retrieval #1<br>(Citrate Buffer ph6) | 1:400           |
| Collagen type III           | polyclonal   | Abcam             | ab7778             | Epitope Retrieval #1<br>(Citrate Buffer ph6) | 1:400           |
| TIM3                        | D5D5R        | Cell Signaling    | 45208              | Epitope Retrieval #2<br>(Tris-EDTA Buffer)   | 1:100           |
| CD8                         | C8/144B      | Thermo Scientific | MS-457s            | Epitope Retrieval #1<br>(Citrate Buffer ph6) | 1:25            |
